1                   **A PUF hub drives self-renewal in *C. elegans* germline stem cells**

2           Kimberly A. Haupt\*, Kimberley T. Law\*<sup>1</sup>, Amy L. Enright\*, Charlotte R. Kanzler\*, Heaji  
3                                   Shin\*<sup>2</sup>, Marvin Wickens\* and Judith Kimble\*

4   \* Department of Biochemistry, University of Wisconsin-Madison, Madison, Wisconsin,  
5   53706

6   <sup>1</sup> Present Address: School of Veterinary Medicine, University of Pennsylvania,  
7   Philadelphia, PA 19104

8   <sup>2</sup> Present Address: The David H. Koch Institute for Integrative Cancer Research, MIT,  
9   Cambridge, MA 02139

10  
11 **Running title:** PUF hub maintains stem cells

12 **Key words or phrases (up to five):** stem cell regulatory network, redundancy, FBF,  
13 PUF-3, PUF-11

14  
15 **Correspondence should be addressed to:**

16           Judith Kimble  
17           Department of Biochemistry  
18           University of Wisconsin-Madison  
19           433 Babcock Drive  
20           Madison, Wisconsin 53706-1544  
21           Telephone: 608-262-6188  
22           Email: [jekimble@wisc.edu](mailto:jekimble@wisc.edu)

23  
24 **ORCID:**

25           K.A.H., 0000-0003-1109-3129  
26           H.S., 000-0001-5208-5999  
27           M.W., 0000-0002-0593-5740  
28           J.K., 0000-0001-5622-2073

29 **ABSTRACT**

30 Stem cell regulation relies on extrinsic signaling from a niche plus intrinsic factors that  
31 respond and drive self-renewal within stem cells. *A priori*, loss of niche signaling and  
32 loss of the intrinsic self-renewal factors might be expected to have equivalent stem cell  
33 defects. Yet this simple prediction has not been borne out for most stem cells, including  
34 *C. elegans* germline stem cells (GSCs). The central regulators of *C. elegans* GSCs  
35 include extrinsically-acting GLP-1/Notch signaling from the niche, intrinsically-acting  
36 RNA binding proteins in the PUF family, termed FBF-1 and FBF-2 (collectively FBF),  
37 and intrinsically-acting PUF partner proteins that are direct Notch targets. Abrogation of  
38 either GLP-1/Notch signaling or its targets yields an earlier and more severe GSC  
39 defect than loss of FBF-1 and FBF-2, suggesting that additional intrinsic regulators must  
40 exist. Here, we report that those missing regulators are two additional PUF proteins,  
41 PUF-3 and PUF-11. Remarkably, an *fbf-1 fbf-2; puf-3 puf-11* quadruple null mutant has  
42 a GSC defect virtually identical to that of a *glp-1/Notch* null mutant. PUF-3 and PUF-11  
43 both affect GSC maintenance; both are expressed in GSCs; and epistasis experiments  
44 place them at the same position as FBF within the network. Therefore, action of PUF-3  
45 and PUF-11 explains the milder GSC defect in *fbf-1 fbf-2* mutants. We conclude that a  
46 “PUF hub”, comprising four PUF proteins and two PUF partners, constitutes the intrinsic  
47 self-renewal node of the *C. elegans* GSC RNA regulatory network. Discovery of this hub  
48 underscores the significance of PUF RNA-binding proteins as key regulators of stem  
49 cell maintenance.

50

## 51 INTRODUCTION

52 Stem cell regulatory networks govern the balance between self-renewal and  
53 differentiation. Transcription factors are well established stem cell regulators (e.g.  
54 BOYER *et al.* 2005), as are RNA-binding proteins (e.g. WICKENS *et al.* 2002; YE AND  
55 BLELLOCH 2014; GROSS-THEBING *et al.* 2017). Indeed, the PUF (for Pumilio and FBF)  
56 family of RNA-binding proteins promote stem cell self-renewal in multiple tissues across  
57 animal phylogeny from planaria to mammals (LIN AND SPRADLING 1997; FORBES AND  
58 LEHMANN 1998; CRITTENDEN *et al.* 2002; SALVETTI *et al.* 2005; NAUDIN *et al.* 2017; ZHANG  
59 *et al.* 2017). Genome-wide studies reveal that PUF proteins bind hundreds of RNAs  
60 (HAFNER *et al.* 2010; KERSHNER AND KIMBLE 2010; PRASAD *et al.* 2016; PORTER *et al.*  
61 2019), consistent with a central role in the stem cell regulatory network (KERSHNER *et al.*  
62 2013). Yet the full significance of PUF proteins in self-renewal has been unclear. Are  
63 PUF proteins the primary stem-cell intrinsic self-renewal regulators? Or do they play  
64 only a supporting role? This question has been difficult to tackle in organisms where  
65 only one or two PUF proteins are responsible for many diverse processes, including  
66 embryogenesis, germ cell development and neural activities. Here we address the  
67 question in nematodes, where the number of genes encoding PUF proteins has  
68 expanded during evolution, yielding functional specialization among family members.

69 We focus here on the role of PUF proteins in regulating self-renewal in the *C.*  
70 *elegans* germline. Germline stem cells (GSCs) expand the germline tissue from two  
71 cells at hatching to ~2000 cells in adults; they replenish the tissue as germ cells are lost  
72 to gametogenesis during reproduction (KIMBLE AND WHITE 1981; CRITTENDEN *et al.*  
73 2006); and they regenerate the tissue upon feeding after starvation (ANGELO AND VAN  
74 GILST 2009; SEIDEL AND KIMBLE 2011). Key regulators of GSC self-renewal include GLP-  
75 1/Notch signaling from the niche; its transcriptional targets, *lst-1* and *sygl-1*; and two  
76 PUF proteins, FBF-1 and FBF-2 (collectively FBF) (Figure 1A) (AUSTIN AND KIMBLE 1987;  
77 CRITTENDEN *et al.* 2002; KERSHNER *et al.* 2014).

78 While FBF-1 and FBF-2 are crucial in GSC control, they cannot account for all  
79 the effects of niche signaling. Removal of either the GLP-1/Notch receptor or both *lst-1*  
80 and *sygl-1* has an early and severe germline proliferation (Glp) defect in both sexes: the  
81 two GSCs at hatching divide once or twice and then differentiate prematurely as sperm

82 (AUSTIN AND KIMBLE 1987; KERSHNER *et al.* 2014). Moreover, GLP-1/Notch and its  
83 targets drive self-renewal throughout larval development and in adults (AUSTIN AND  
84 KIMBLE 1987; KERSHNER *et al.* 2014). By contrast, GSCs in the *fbf-1 fbf-2* double mutant  
85 are lost to differentiation much later, at the fourth larval stage (L4s) (CRITTENDEN *et al.*  
86 2002). Indeed, this delayed L4 GSC defect occurs in mutants raised at 15° and 20°, but  
87 at 25°, the effect is even further delayed with GSCs continuing to divide in adults and  
88 persisting in an undifferentiated state (MERRITT *et al.* 2008; SHIN *et al.* 2017; this work).  
89 We designate the less severe germline phenotype of *fbf-1 fbf-2* mutants pGlp (“partial  
90 Glp”) to distinguish it from the more severe Glp GSC defect seen upon loss of niche  
91 signaling. The pGlp defect implies that some other self-renewal factor, “gene X” (Figure  
92 1A), must maintain GSCs in larvae at all temperatures and in adults at 25°.

93 Here, we report that two additional PUF proteins, PUF-3 and PUF-11, are gene  
94 X. When PUF-3 and PUF-11 are removed in an *fbf-1 fbf-2* mutant, the GSC defect is  
95 essentially the same as that seen upon loss of niche signaling. Additional results solidify  
96 the conclusion that PUF-3 and PUF-11 are intrinsic regulators of GSC self-renewal. We  
97 conclude that a “PUF hub”, comprising four PUF proteins and two PUF partners,  
98 constitutes the intrinsic self-renewal node of the *C. elegans* GSC RNA regulatory  
99 network. Discovery of this hub underscores the significance of PUF RNA-binding  
100 proteins as key regulators of stem cell maintenance.

## 101 MATERIALS AND METHODS

### 102 Nematode strains and maintenance

103 *C. elegans* strains were maintained at 20°, unless specified otherwise, on nematode  
104 growth medium (NGM) plates spotted with *E. coli* OP50 (BRENNER 1974). Wild-type was  
105 N2 Bristol strain. For a complete list of strains used in this study, see Table S1. *puf-*  
106 *11(gk203683)* is from the Million Mutations Project (THOMPSON *et al.* 2013). We also  
107 used the following balancers: *hT2[qIs48] I;III* (SIEGFRIED AND KIMBLE 2002),  
108 *mIn1[mIs14dpy-10(e128)] II* (EDGLEY AND RIDDLE 2001) and *nT1[qIs51] IV;V* (EDGLEY *et*  
109 *al.* 2006).

110 Due to incompatibility between *mIn1* and *nT1* balancers, we generated a “pseudo  
111 ( $\Psi$ )-balancer” to maintain quadruple mutant strains. This *LG II  $\Psi$* -balancer harbors a

112 transgene driving expression of a red fluorescent protein in somatic nuclei, *oxTi564*  
113 [*Peft-3::tdTomato::H2B::unc-54 3'UTR + Cbr-unc-119(+)*] (FRØKJÆR-JENSEN *et al.* 2014)  
114 plus a closely linked *dpy-10(q1074)* deletion. Quadruple mutants were thus maintained  
115 as *fbf-1 fbf-2/Ψ-balancer [dpy-10(q1074) oxTi564] II; puf-3 puf-11 IV/nT1[qIs51] IV;V*.

## 116 **CRISPR/Cas9 genome editing**

117 We used RNA-protein complex CRISPR/Cas9 genome editing with a co-conversion  
118 strategy (ARRIBERE *et al.* 2014; PAIX *et al.* 2015) to generate a number of alleles for this  
119 work (see Table S2 for details). For each edit, we prepared an injection mix containing:  
120 gene-specific crRNAs (10 μM, IDT-Alt-R™); *dpy-10* or *unc-58* co-CRISPR crRNAs (4  
121 μM, IDT-Alt-R™); tracrRNAs (13.6 μM, IDT-Alt-R™); gene specific repair oligo (4 μM);  
122 *dpy-10* or *unc-58* repair oligo (1.34 μM); and Cas-9 protein (24.5 μM). Wild-type  
123 germlines were injected to make *puf-3(q966)*, *puf-11(q971)*, *puf-3(q1058)* and *puf-*  
124 *11(q1128)*; EG7866 germlines were injected for *dpy-10(q1074)*. F1 progeny of injected  
125 hermaphrodites were screened for desired mutations by PCR and Sanger sequencing.  
126 Each allele was outcrossed with wild-type at least twice prior to analysis.

## 127 **Isolation of *puf-3(q801)***

128 The *puf-3(q801)* 776 nucleotide deletion allele was isolated from a mutagenized library  
129 (gift of Maureen Barr), PCR screened to identify homozygotes and outcrossed against  
130 wild-type six times before analysis.

## 131 **RNA interference**

132 For RNA interference (RNAi), we identified clones targeting *puf-3*, *puf-5*, *puf-6*, *puf-7*,  
133 *puf-8* and *puf-9* from the Ahringer library (FRASER *et al.* 2000). The library does not  
134 include a clone targeting *puf-11*, so we generated one using the Gibson assembly  
135 method (GIBSON 2009). Nucleotides 1-800 of the *puf-11* ORF were amplified from *C.*  
136 *elegans* cDNA and cloned into the plasmid L4440 at the *Nco* I site. For all RNAi  
137 experiments, the L4440 plasmid lacking a gene of interest (“empty” RNAi) served as a  
138 control.

139 To perform RNAi by feeding (TIMMONS AND FIRE 1998), *E. coli* HT115(DE3) were  
140 transformed with RNAi vectors and cultured at 37° overnight in 2xYT media containing  
141 25 μg/μl carbenicillin and 50 μg/μl tetracycline. Bacterial cultures were concentrated and

142 seeded onto NGM plates containing 1mM IPTG, then induced overnight at RT. We then  
143 placed mid L4 hermaphrodites on these plates. For experiments shown in Figure 3D,E,  
144 we assayed treated animals 48 hours after plating. For all other experiments, treated  
145 animals were allowed to lay eggs and their F1 progeny were assayed for defects.

#### 146 **Analysis and quantification of germ cells in adults**

147 We first staged animals to roughly the same stage of adulthood. Specifically, we picked  
148 mid-L4s raised at 15°, 20° or 25° for at least one generation and grew them for an  
149 additional 18 hours (25°), 24 hours (20°) or 36 hours (15°) to synchronize adults for  
150 analysis. Whole worms were then DAPI stained and imaged by compound microscopy.  
151 The presence or absence of a progenitor zone (PZ) was assayed by nuclear  
152 morphology of germ cells at the distal end of the gonad: those lacking meiotic nuclear  
153 morphology and often possessing M-phase or anaphase nuclei were scored as PZ-  
154 positive (see also PZ analysis, below); those having a meiotic prophase nuclear  
155 morphology were scored as “meiotic” and PZ-negative; arms where all germ cells had  
156 differentiated as mature sperm were scored as “sperm” and PZ-negative. To estimate  
157 total germ cell number, we counted mature sperm (which have a distinctive, compact  
158 DAPI morphology) using the Multipoint Tool in Fiji/ImageJ (SCHINDELIN *et al.* 2012) and  
159 then divided sperm number by four (each germ cell makes four sperm). In some cases,  
160 we counted sperm number in one gonadal arm and multiplied that number by two to  
161 estimate total sperm number. In cases where all germ cells in an animal had not yet  
162 differentiated to sperm, we did not count total germ cells.

#### 163 **Phenotype analyses: Fertility, brood size, and embryo viability**

164 L4 hermaphrodites were placed onto individual plates at 20°. At 6- to 24-hour intervals,  
165 each hermaphrodite was moved to a new plate and the embryos were counted to score  
166 for fertility and determine brood size. Several days later, hatched progeny on each plate  
167 were counted to determine embryo lethality.

#### 168 **Progenitor zone (PZ) analysis**

169 From roughly staged adults as described above, gonads were extruded, DAPI stained,  
170 and imaged by compound or confocal microscopy. We examined morphology of  
171 germline nuclei to determine PZ size according to convention (CRITTENDEN *et al.* 2006;

172 SEIDEL AND KIMBLE 2015) (see also Figure 1E). Briefly, DAPI-staining of nuclei in early  
173 meiotic prophase adopts a crescent shape. To count number of germ cells in a PZ, we  
174 counted the total number of cells in the distal germline that had not entered early  
175 meiotic prophase, using Fiji/ImageJ Cell Counter plugin (SCHINDELIN *et al.* 2012). We  
176 also measured the distance to the end of the PZ in germ cell diameters (gcd) from the  
177 distal end. To this end, we selected a middle focal plane and counted the number of  
178 germline nuclei along each edge of the gonad until the first one with crescent  
179 morphology. We averaged the two values from each edge to determine PZ size.

### 180 **Quantification of germ cells in larvae**

181 To generate roughly synchronous embryos, we allowed gravid hermaphrodites to lay  
182 eggs for 2 hours at 20°. At subsequent timepoints corresponding to early L1, early L2,  
183 late L2 and early L4, larvae were harvested and germ cell number quantitated. For early  
184 L1s, we scored germ cell number in live animals by DIC microscopy. For all remaining  
185 samples, we used whole mount staining with the reduction/oxidation method (FINNEY  
186 AND RUVKUN 1990; MILLER AND SHAKES 1995). Briefly, samples were fixed in Ruvkun  
187 Fixation Buffer with 1% (v/v) paraformaldehyde for 30 minutes. Disulfide linkage  
188 reduction was performed, then samples were incubated in blocking solution (PBS with  
189 1% (w/v) bovine serum albumin, 0.5% (v/v) Triton X-100, 1 mM EDTA) for 40 minutes at  
190 RT, followed by overnight incubation at 4° with rabbit  $\alpha$ -PGL-1 (1:100, gift from Susan  
191 Strome, University of California, Santa Cruz) diluted in blocking solution. Secondary  
192 Alexa 555 donkey  $\alpha$ -rabbit (1:1000, Thermo Fisher Scientific #A31570) antibody was  
193 diluted in blocking solution and incubated with samples for at least one hour along with  
194 1 ng/ $\mu$ l DAPI for DNA visualization. Samples were mounted in Vectashield (Vector  
195 Laboratories #H1000) on 2% agarose pads then assayed by fluorescent compound  
196 microscopy. Number of germ cells in L2s was determined by counting the total number  
197 of PGL-1-positive cells. For early L4s, we counted the number of PGL-1-positive cells  
198 in one gonadal arm then multiplied by two to estimate the total number of germ cells per  
199 animal.

## 200 **Immunostaining and DAPI staining**

201 We immunostained gonads as described (CRITTENDEN *et al.* 2017) with minor  
202 modifications. To extrude gonads, we dissected animals in PBS buffer with 0.1% (v/v)  
203 Tween-20 (PBStw) and 0.25 mM levamisole. Gonads were fixed in 3% (w/v)  
204 paraformaldehyde diluted in PBStw for 10 minutes, then permeabilized in either 0.2%  
205 (v/v) Triton-X diluted in PBStw or ice-cold methanol for 10-15 minutes. Next, gonads  
206 were incubated for at least 1 hour in blocking solution (0.5% (w/v) bovine serum albumin  
207 diluted in PBStw) and incubated overnight at 4° with primary antibodies diluted in  
208 blocking solution as follows: mouse  $\alpha$ -V5 (1:1000, SV5-Pk1, Bio-Rad #MCA1360);  
209 mouse  $\alpha$ -SP56 (1:200, gift from Susan Strome, University of California, Santa Cruz).  
210 Secondary antibody Alexa 488 donkey  $\alpha$ -mouse (1:1000, Thermo Fisher Scientific  
211 #A21202) was diluted in blocking solution and incubated with samples for at least one  
212 hour. To visualize DNA, DAPI (4',6-diamidino-2-phenylindole) was included with the  
213 secondary antibody at a final concentration of 1 ng/ $\mu$ l. Samples were mounted in  
214 Vectashield (Vector Laboratories #H1000) or ProLong Gold (Thermo Fisher Scientific  
215 #P36930) before imaging. All steps were performed at room temperature unless  
216 otherwise indicated. Where only DNA visualization was required, we skipped all  
217 blocking solution steps and simply incubated samples in PBStw with 1 ng/ $\mu$ l DAPI for 15  
218 minutes prior to mounting.

## 219 **Microscopy**

220 Images in Figure 2C,D, 3D,E, 5B-G and Figure S1A,B and S4B-J were taken using a  
221 laser scanning Leica TCS SP8 confocal microscope fitted with both photomultiplier and  
222 hybrid detectors and run using LAS software version X. A 63x/1.40 CS2 HC Plan  
223 Apochromat oil immersion objective was used. All images were taken with 400 Hz  
224 scanning speed and 125-200% zoom. To prepare images for figures, Adobe Photoshop  
225 was used to equivalently and linearly adjust intensity among images to be compared.  
226 Images in Figure 1F,G, 4A-D and S5 were captured using a Hamamatsu ORCA-  
227 Flash4.0 CMOS camera on a Zeiss Axioskop compound microscope equipped with 63x  
228 1.4NA Plan Apochromat oil immersion objective. The fluorescent light source was a  
229 Lumencore SOLA Light Engine, and Carl Zeiss filter sets 49 and 38 were used for DAPI  
230 and Alexa 488 visualization. The acquisition software was Micromanager (EDELSTEIN *et*



231 *al.* 2010; EDELSTEIN *et al.* 2014). When required, images were combined using the  
232 Pairwise Stitching function in Fiji/ImageJ (PREIBISCH *et al.* 2009). To prepare images for  
233 figures, Adobe Photoshop was used to adjust intensity equivalently and linearly among  
234 images to be compared.

### 235 **Fluorescence quantitation**

236 Quantitation of fluorescence in Figures 5H,I was performed with Fiji/ImageJ (SCHINDELIN  
237 *et al.* 2012). In Figure 5H, we performed four independent immunostaining experiments  
238 and quantitated a total of at least 27 gonads per genotype. In Figure 5I, we performed  
239 two independent experiments and quantitated at least 24 gonads per genotype. From  
240 confocal image stacks, we collected raw pixel intensity data from each gonad image by  
241 projecting the sum of all Z-slices onto a single plane. A freehand line, 50 pixels wide  
242 and 50  $\mu\text{m}$  long that bisected the gonad, was drawn manually using the Plot Profile tool  
243 starting at the distal tip of the tissue. We found the mean intensity value of the plot  
244 profile of each gonad to get a single value reflecting the amount of protein present.  
245 Next, we subtracted any signal representing nonspecific antibody binding for each  
246 independent experiment: we calculated the mean intensity value in the respective wild-  
247 type control gonads, then subtracted it from each experimental sample. In Figure 5H,I,  
248 we report the background subtracted mean and standard error.

### 249 **Genetic epistasis experiments**

250 To test the relationship between *lst-1 sygl-1* and *fbf-1 fbf-2; puf-3 puf-11*, we used  
251 transgenes that ubiquitously express LST-1 and SYGL-1 protein. Because these *lst-*  
252 *1(gf)* and *sygl-1(gf)* transgenes cause germline tumors and are sterile, they were  
253 maintained on *lst-1* or *sygl-1* RNAi, respectively, prior to the experiment. Expression of  
254 LST-1 or SYGL-1 was then induced by transferring L4s to OP50-seeded NGM plates  
255 and passaging for several generations (SHIN *et al.* 2017). The assay for Figure 6A was  
256 performed at 25°. From populations grown for 9 generations on OP50, we plated L4s  
257 onto *puf-3/11* RNAi. Next, progeny of *puf-3/11* RNAi treated animals were staged to 24  
258 hours past L4 and stained with DAPI to assay effects on germline development.  
259 Because *lst-1* and *sygl-1* require *fbf-1 fbf-2* for function, neither *lst-1(gf)* nor *sygl-1(gf)*  
260 formed a germline tumor in these experiments.

261 To test the relationship between *gld-2 gld-1* and *fbf-1 fbf-2; puf-3 puf-11* for  
262 Figure 6B, we plated mid-L4 staged JK5778 to *puf-3/11* RNAi plates at 20°. F1 progeny  
263 were staged to 24 hours past L4, then DAPI stained and imaged using compound  
264 microscopy to assay germline phenotype.

### 265 **Statistical analysis**

266 Welch's ANOVA and Games-Howell *post hoc* tests were performed to calculate  
267 statistical significance for multiple samples. All statistical tests were performed in R and  
268 the *p*-value cut off was 0.05.

### 269 **Yeast two-hybrid**

270 Modified yeast two-hybrid assays were performed as described (BARTEL AND FIELDS  
271 1997). PUF proteins were fused to the LexA DNA binding domain as follows: cDNA  
272 sequences encoding PUF repeats of FBF-1 (amino acids 121-614), FBF-2 (121-632),  
273 PUF-3 (88-502), PUF-9 (162-703) and PUF-11 (91-505) were each cloned into the *Nde*  
274 I site of pBTM116 using the Gibson assembly method (GIBSON *et al.* 2009). We also  
275 used full-length LST-1 (1-328) and SYGL-1(1-206) fused to Gal4 activation domain in  
276 the pACT2 vector (SHIN *et al.* 2017). More details about plasmids are available in Table  
277 S3. To test for protein-protein interactions between PUFs and LST-1/SYGL-1, activation  
278 and binding domain pairs were co-transformed into a L40-*ura3* strain (*MATa, ura3-52,*  
279 *leu2-3,112, his3Δ200, trp1Δ1, ade2, LYS2:::(LexA-op)<sub>4</sub>-HIS3, ura3:::(LexA-op)<sub>8</sub>-LacZ*)  
280 using the LiOAc method (GIETZ AND SCHIESTL 2007). *LacZ* reporter activity was  
281 measured using the Beta-Glo® Assay system (Promega #E4720), following commercial  
282 protocols and yeast-specific methods (HOOK *et al.* 2005). Luminescence was  
283 quantitated using a Biotek Synergy H4 Hybrid plate reader with Gen5 software.

### 284 **Western blot**

285 For the western blot in Figure 7C, we grew yeast transformants in -Leu -Trp liquid media  
286 and prepared samples by boiling yeast in sample buffer (60mM Tris pH 6.8, 25%  
287 glycerol, 2% SDS, 0.1% bromophenol blue with 14 mM beta-mercaptoethanol or 100  
288 mM DTT). Analysis was conducted on a 4-15% SDS-PAGE gradient gel (Biorad #456-  
289 1083). We probed with primary antibodies overnight at 4° as follows: 1:50,000 mouse  
290 anti-HA (HA.11, Covance #MMS-101R), 1:1000 mouse anti-V5 (1:1000, SV5-Pk1, Bio-

291 Rad #MCA1360), or 1:10,000 mouse anti-actin (C4, Millipore #MAB1501). For  
292 secondary antibodies, blots were incubated for 1-2 hours at RT with 1:20,000 donkey  
293 anti-mouse horseradish peroxidase (Jackson ImmunoResearch #715-035-150).  
294 Immunoblots were developed using SuperSignal™ West Pico/Femto Sensitivity  
295 substrate (Thermo Scientific #34080, #34095) and a Konica Minolta SRX-101A medical  
296 film processor. For final figure preparations, intensity of the blot was linearly adjusted in  
297 Adobe Photoshop.

#### 298 **Data and reagent availability**

299 The authors affirm that all data necessary for confirming the conclusions of this article  
300 are present within the article, tables, figures, and supplemental material. All strains and  
301 plasmids are available upon request or via the Caenorhabditis Genetic Center,  
302 supported by the NIH Office of Research Infrastructure Programs (P40 OD010440). All  
303 protocols are available upon request.

## 304 **RESULTS**

### 305 **Solidifying evidence for the existence of gene X**

306 The existence of a missing GSC self-renewal regulator, gene X, was proposed because  
307 of striking differences in GSC defects upon removal of either the GLP-1/Notch receptor  
308 or its target genes (*lst-1* and *sygl-1*) on the one hand and removal of FBF-1 and FBF-2  
309 on the other (Figure 1B) (AUSTIN AND KIMBLE 1987; CRITTENDEN *et al.* 2002; KERSHNER *et*  
310 *al.* 2014). To provide comprehensive data as a critical baseline for this study, we scored  
311 GSC defects in key mutants at 15°, 20° and 25° (Figure 1C). As expected, mutants  
312 lacking GLP-1/Notch or both its target genes, *lst-1* and *sygl-1*, generated only about four  
313 germ cells at each temperature, but *fbf-1 fbf-2* double mutants made many more (Figure  
314 1C). In addition, *fbf-1 fbf-2* mutants raised at 25° possessed distal germ cells in mitotic  
315 metaphase or anaphase, consistent with active divisions (Figure S1A). A previous study  
316 showed that these distal cells express the mitotic marker, nuclear REC-8 (see SHIN *et*  
317 *al.* 2017, Fig S5G). Thus, loss of FBF-1 and FBF-2 has a much less severe and later  
318 effect on GSC maintenance than loss of niche signaling or loss of the niche targets,  
319 confirming the notion of some missing self-renewal regulator (gene X, Figure 1A).

## 320 **PUF-3 and PUF-11 proteins are likely the missing self-renewal regulators**

321 To begin our search for the missing GSC regulators, we considered other PUF proteins  
322 as logical candidates. Among 10 *C. elegans* PUF-encoding genes (LIU *et al.* 2012),  
323 PUF-11 piqued our interest because of two similarities with FBF: the PUF-11 protein  
324 interacts with LST-1 in a genome-wide yeast two-hybrid screen (BOXEM *et al.* 2008), and  
325 its RNA binding specificity is similar to that of FBF (BERNSTEIN *et al.* 2005; KOH *et al.*  
326 2009). Because the *C. elegans* genome encodes a PUF-11 paralog with nearly identical  
327 sequence, called PUF-3 (Figure 1D, Figure S2), we tested both for a role in GSC  
328 maintenance. To this end, we used two feeding RNAi clones, one targeting *puf-3* (RNAi  
329 A) and the other targeting a distinct region of *puf-11* (RNAi B) (Figure 1D). Although  
330 these RNAi clones target different gene regions, each was expected to deplete both  
331 *puf-3* and *puf-11* because of their ~90% sequence identity (HUBSTENBERGER *et al.*  
332 2012).

333 A previous *puf-3/11* RNAi study, performed in wild-type animals, identified a role  
334 for PUF-3 and PUF-11 in oogenesis, but not GSC maintenance (HUBSTENBERGER *et al.*  
335 2012). We therefore sought a more GSC-specific assay and turned to enhancement of  
336 the *fbf-1 fbf-2* pGlp phenotype at 25°. For this analysis, we scored the presence or  
337 absence of a progenitor zone (PZ), the distal region where germ cells have not yet  
338 entered into the meiotic cell cycle and continue mitotic divisions (Figure 1E). Whereas  
339 all *fbf-1 fbf-2* adults on empty vector RNAi possessed a PZ at 25° (Figure 1F,H), most  
340 treated with *puf-3/11* RNAi lost their PZ to differentiation (Figure 1G). A comparable  
341 effect was seen in both sexes (Figure 1H). Strikingly, GSC divisions generated only ~4  
342 germ cells per gonad in each sex (Figure 1I), as determined by counting the number of  
343 mature sperm in adults and dividing by four. RNAi directed against other *puf* loci (e.g.  
344 *puf-8*) did not enhance the pGlp *fbf-1 fbf-2* phenotype (Figure S1B). Therefore, *puf-3/11*  
345 RNAi enhances the *fbf-1 fbf-2* germline phenotype from its partial pGlp to the full Glp  
346 typical of GLP-1/Notch mutants. This enhancement indicates that PUF-3 and PUF-11  
347 are likely the missing self-renewal regulators.

## 348 ***puf-3* and *puf-11* mutants have no GSC proliferation defects on their own**

349 The *puf-3/11* RNAi experiments could not distinguish between the *puf-3* and *puf-11*  
350 genes for effects on GSC maintenance. To test their individual roles, we analyzed *puf-3*

351 and *puf-11* single mutants: three deletions, *puf-3(q801)*, *puf-3(q966)* and *puf-11(q971)*,  
352 and one nonsense allele, *puf-11(gk203683)* (Figure 2A, Figure S2). As a measure of  
353 general germline function, we scored fertility, number of embryos laid and embryo  
354 viability. The single mutants were fertile with brood sizes comparable to wild-type, and  
355 their embryos hatched into young larvae, except for *puf-11(q971)*, which had a partially  
356 penetrant embryonic lethality (Figure 2B). In addition, we scored PZ lengths as a proxy  
357 for effects on GSCs. The PZ lengths, measured with the conventional metric of germ  
358 cell diameters (gcd) from the distal end, were roughly the same as wild-type in all *puf-3*  
359 and *puf-11* single mutants (Figure 2B). Therefore, *puf-3* and *puf-11* single mutants have  
360 no major GSC proliferation defects.

361 We next assessed *puf-3 puf-11* double mutants (Figure 2B-F). Germlines had an  
362 organization and size comparable to wild-type (Figure 2C, D), but they made no viable  
363 embryos (Figure 2B). Male *puf-3 puf-11* crossed to feminized *fog-1* hermaphrodites  
364 yielded ample cross progeny, so *puf-3 puf-11* sperm are functional. By contrast, wild-  
365 type males crossed to *puf-3 puf-11* hermaphrodites failed to make viable progeny,  
366 suggesting that *puf-3 puf-11* oocytes are defective, consistent with prior studies  
367 (HUBSTENBERGER *et al.* 2012; HUBSTENBERGER *et al.* 2013). PZ lengths were comparable  
368 to wild-type, scored at 20° (Figure 2B), and number of germ cells therein were  
369 comparable to wild-type at both 20° and 25° (Figure 2E,F). Therefore, *puf-3 puf-11*  
370 double mutants have an oogenesis defect, as previously recognized, but no obvious  
371 GSC defects.

### 372 ***puf-3* and *puf-11* enhancement of *fbf-1 fbf-2* partial Glp phenotype**

373 To further explore *puf-3* and *puf-11* roles in GSC maintenance, we tested for  
374 enhancement of the *fbf-1 fbf-2* pGlp phenotype using *fbf-1 fbf-2; puf* triple mutants as  
375 well as *fbf-1 fbf-2; puf-3 puf-11* quadruple mutants. To score enhancement, we  
376 determined total germ cells made in each strain by counting mature sperm number in  
377 adults and dividing by four (Figure 3A,B); at 25°, we scored for the persistence of a PZ  
378 in adults (Figure 3C,D).

379 We first assayed triple mutants raised at 20° (Figure 3A, left; Figure S3). The  
380 control *fbf-1 fbf-2* double mutants made roughly 100 germ cells before GSCs were lost  
381 to spermatogenesis, as previously described (CRITTENDEN *et al.* 2002; LAMONT *et al.*

2004; this work). That number decreased in both triple mutants, but the extent of pGlp enhancement differed for *puf-3* and *puf-11*. The decrease in germ cell number was small in *fbf-1 fbf-2; puf-3* triple mutants and statistically significant for only one allele; the decrease was larger in *fbf-1 fbf-2; puf-11* mutants and statistically significant for both alleles. Nonetheless, each *puf* gene contributed to larval GSC proliferation at 20°.

We also assayed triple mutants raised at 25° (Figure 3A, right; Figure 3B; Figure S3). The control *fbf-1 fbf-2* double mutants made more than 100 germ cells and maintained a PZ, as described previously (MERRITT *et al.* 2008; SHIN *et al.* 2017; this work). In *fbf-1 fbf-2; puf-3* triple mutants, germline size was comparable to *fbf-1 fbf-2* double mutants (Figure 3A, right), but many PZs were lost to meiotic entry (Figure 3B). By contrast, *fbf-1 fbf-2; puf-11* triple mutants at 25° made far fewer germ cells overall than *fbf-1 fbf-2* (Figure 3A, right), and had a fully penetrant PZ loss with all germ cells differentiating as sperm (Figure 3B). Thus, each *puf* gene enhanced the *fbf-1 fbf-2* pGlp defect at 25°, with *puf-11* again having a more severe effect than *puf-3*.

We next assayed *fbf-1 fbf-2; puf-3 puf-11* quadruple mutants, this time raised at 15°, 20° or 25°. The two distinct quadruple mutants, *fbf-1 fbf-2; puf-3(q966) puf-11(q971)* and *fbf-1 fbf-2; puf-3(q801) puf-11(gk203683)*, were remarkably similar at all three temperatures. Adults had tiny germlines composed entirely of mature sperm. Upon quantitation (Figure 3C; Figure S3), quadruples made a total of 4-9 germ cells on average at 15° and 25°, and 11-16 at 20°. This quadruple Glp phenotype is thus comparable to *glp-1* and *lst-1 sygl-1* null mutants. Thus, PUF-3 and PUF-11 function during larval development to maintain GSC divisions.

We finally asked if PUF-3 and PUF-11 maintain the PZ in *fbf-1 fbf-2* double mutant adults at 25°. To address this question, we treated mid-L4 *puf-3(q966) puf-11(q971)* double mutants with *fbf-1/2* RNAi and assayed PZ presence or absence in adults (48 hours later). Most wild-type animals treated with *fbf-1/2* RNAi retained a PZ (92%, n=12) (Figure 3D). However, few *puf-3 puf-11* double mutants treated with *fbf-1/2* RNAi retained a PZ (7%, n=30) (Figure 3E). Instead, distal-most germ cells entered early meiotic prophase, visualized by a nuclear “crescent” morphology. Thus, PUF-3 and PUF-11 function in 25° *fbf-1 fbf-2* adults to maintain a progenitor zone.

## 412 **GSC maintenance fails during early larval development in quadruple mutants**

413 Up to this point in this work, germ cell counts were performed in adults by counting  
414 sperm. This approach quantitates number of cells generated and differentiated, but  
415 cannot detect cells that die without differentiation into gametes. Although germ cell  
416 death was not seen in *glp-1* or *lst-1 sygl-1* mutants (AUSTIN AND KIMBLE 1987; KERSHNER  
417 *et al.* 2014), the *fbf-1 fbf-2; puf-3 puf-11* quadruple mutant may be different.

418 To begin, we assessed overall germline sizes at the L4 stage, which were  
419 comparable in wild-type, *fbf-1 fbf-2* and *puf-3 puf-11*, but much smaller in quadruple  
420 mutants (Figure 4A-D). Next, we counted total germ cell number at specific intervals  
421 during larval development. For this experiment, we scored *fbf-1 fbf-2; puf-3 puf-11*  
422 quadruple mutants and several controls (wild-type, *fbf-1 fbf-2* doubles, *puf-3 puf-11*  
423 doubles and *glp-1*), all maintained at 20°. PGL-1 staining was used to identify germ cells  
424 for counting (except for early L1, which was scored by DIC in live animals). We found  
425 that germ cell numbers increased similarly during larval development in wild-type, *fbf-1*  
426 *fbf-2* and *puf-3 puf-11* animals, but they did not increase appreciably in *glp-1* or the *fbf-1*  
427 *fbf-2; puf-3 puf-11* quadruple mutant (Figure 4E,F). By L4, the quadruple mutants had  
428 made a total of 15 germ cells on average (range=12-20, n=5) (Figure 4E,F), similar to  
429 the number of germ cells estimated from adult sperm number at the same temperature  
430 (Figure 3B,C) and consistent with cell death having little impact on germ cell number. In  
431 parallel, we visualized meiotic entry with DAPI staining. By late L2, germ cells in  
432 quadruple mutants had entered meiotic prophase, whereas wild-type, *fbf-1 fbf-2* and  
433 *puf-3 puf-11* had not. No morphological sign of germ cell death was seen over the  
434 course of these experiments. Together, these findings allay the concern that *puf-3 puf-*  
435 *11* mutants might reduce germ cell number by promoting cell death and thus support  
436 the conclusion that *puf-3* and *puf-11* normally promote self-renewal during larval  
437 development.

## 438 **PUF-3 and PUF-11 expression in GSCs**

439 To test whether PUF-3 and PUF-11 proteins are expressed in GSCs, we generated V5  
440 epitope tagged alleles (Figure 5A; Figure S2). Both PUF-3<sup>V5</sup> and PUF-11<sup>V5</sup> are  
441 functional, as assayed by their lack of *fbf* enhancement (Figure S4A). Upon  
442 immunostaining and imaging, PUF-3<sup>V5</sup> and PUF-11<sup>V5</sup> proteins were observed in the

443 distal germlines of mid-L4 hermaphrodites raised at 20° (Figure 5B-D; Figures S4B-D  
444 for full gonad), of adult hermaphrodites raised at 20° (Figure S4E-G) and of mid-L4  
445 males raised at 20° (Figure S4H-J). In addition, both proteins were present more  
446 proximally in developing oocytes (Figure S4E-G). As expected for PUF proteins, both  
447 PUF-3<sup>V5</sup> and PUF-11<sup>V5</sup> were cytoplasmic (Figure 5E-G) and localized to perinuclear  
448 granules (Figure 5E,F insets), consistent with an RNA regulatory role. No  $\alpha$ -V5 staining  
449 was seen in wild-type germlines, as expected because they lacked the epitope tag. We  
450 quantified the PUF-3<sup>V5</sup> and PUF-11<sup>V5</sup> signal in the distal gonads of L4s and adults at  
451 20° (Figure 5H,I), subtracting the very low background in wild-type for each. PUF-11  
452 was more abundant than PUF-3 at both stages. Finally, we confirmed expression of  
453 both proteins in adult distal germlines at 25° and again quantitated the signal (Figure  
454 5I). We conclude that PUF-3 and PUF-11 are expressed in GSCs.

#### 455 ***puf-3 puf-11* placement in GSC regulatory pathway**

456 The notion that *puf-3* and *puf-11* represent the missing self-renewal regulators, dubbed  
457 gene X, predicts their placement in the GSC regulatory pathway (Figure 1A). Their *fbf*  
458 enhancement, reported above, is consistent with *puf-3 puf-11* functioning in parallel to  
459 *fbf-1 fbf-2*, but we conducted two additional epistasis experiments to solidify that  
460 pathway position. For these experiments, we used RNAi to deplete *puf-3* and *puf-11*,  
461 both for ease of genetic manipulation and because GSC defects were comparable after  
462 RNAi and in quadruple mutants.

463 We first investigated the relationship between *puf-3 puf-11* and *lst-1 sygl-1*  
464 (Figure 6A; Figure S6A-D). Previous studies showed that *fbf-1 fbf-2* functions either  
465 downstream or in parallel to *lst-1 sygl-1*. This pathway placement was deduced using  
466 gain-of-function (*gf*) mutants of *lst-1* and *sygl-1*. Both *lst-1(gf)* and *sygl-1(gf)* make  
467 massive germline tumors when *fbf-1* and *fbf-2* are wild-type, but acquire a pGlp  
468 phenotype when *fbf-1* and *fbf-2* are removed in *lst-1(gf); fbf-1 fbf-2* and *sygl-1(gf); fbf-1*  
469 *fbf-2* triple mutants (SHIN *et al.* 2017). To ask if *puf-3* and *puf-11* have the same genetic  
470 relationship to *lst-1* and *sygl-1*, we treated *lst-1(gf); fbf-1 fbf-2* and *sygl-1(gf); fbf-1 fbf-2*  
471 triple mutants with either empty vector RNAi as a control or *puf-3/11* RNAi. The control  
472 germlines had a pGlp phenotype (Figure 6A, Figure S6A,C), as shown previously (SHIN  
473 *et al.* 2017). However, with *puf-3/11* RNAi, most germlines had a fully Glp phenotype,



474 typical of *fbf-1 fbf-2; puf-3 puf-11* quadruple mutants. Their germlines were tiny with only  
475 a few sperm (Figure S6B,D), and upon quantitation, only 4-8 germ cells were made on  
476 average per animal (Figure 6A). Therefore, *puf-3* and *puf-11* likely function downstream  
477 or in parallel to *lst-1* and *sygl-1* (Figure 6C).

478 We next investigated the relationship between *puf-3 puf-11* and *gld-1 gld-2*  
479 (Figure 6B; Figure S6E,F). The *gld-1* and *gld-2* genes promote meiotic entry and in their  
480 absence, the germline becomes tumorous (KADYK AND KIMBLE 1998). Previous studies  
481 showed that *fbf-1 fbf-2* functions upstream of *gld-1 gld-2*. Thus, *gld-1 gld-2* tumors are  
482 epistatic to *fbf-1 fbf-2* pGlp (ECKMANN *et al.* 2004). To ask if *puf-3* and *puf-11* are  
483 similarly upstream of *gld-1 gld-2*, we treated *gld-1 gld-2; fbf-1 fbf-2* quadruple mutants  
484 with *puf-3/11* RNAi. Indeed, *gld-1 gld-2* tumors were still found, demonstrating *gld-1 gld-*  
485 *2* epistasis over *fbf-1 fbf-2; puf-3/11* RNAi (Figure 6B, Figure S6E,F). We confirmed that  
486 *puf-3,11* RNAi knockdown was successful by comparison with embryos of wild-type  
487 siblings (Figure S5G). Therefore, *puf-3* and *puf-11* function upstream of *gld-1 gld-2*  
488 (Figure 6C). Together, these experiments place *puf-3* and *puf-11* into the GSC  
489 regulatory pathway in a position consistent with their proposed identity as *gene X*.

#### 490 **PUF-3 interacts with SYGL-1 in yeast**

491 Placement of *puf-3 puf-11* alongside *fbf-1 fbf-2* in the genetic pathway (above), together  
492 with their molecular identity as PUF RNA binding proteins, suggests that PUF-3 and  
493 PUF-11 may have molecular activities in GSCs similar to FBF. Previous studies showed  
494 that FBF-1 and FBF-2 physically interact with Notch targets LST-1 and SYGL-1 (SHIN *et*  
495 *al.* 2017; QIU *et al.* 2019). Moreover, the LST-1 and SYGL-1 partnerships with FBF are  
496 essential *in vivo* for GSC self-renewal (HAUPT *et al.* 2019; C.R. Kanzler and H.J. Shin,  
497 unpublished). We therefore considered the possibility that PUF-3 and PUF-11 also form  
498 partnerships with LST-1 and SYGL-1. Indeed, a genome-wide interaction screen had  
499 already shown that an interaction between PUF-11 and LST-1 in yeast (BOXEM *et al.*  
500 2008). We therefore focused our yeast two hybrid assays (Figure 7A) on interactions  
501 between PUF-3/PUF-11 and SYGL-1. FBF-1 and FBF-2 were tested as positive  
502 controls, and PUF-9 as a likely negative control. PUF-3 interacted robustly with SYGL-1,  
503 but PUF-9 and PUF-11 did not (Figure 7B). The discrepancy between PUF-3 and PUF-  
504 11 was initially confounding given the similarity of the two proteins. However, a Western

505 blot revealed that PUF-11 was poorly expressed in yeast (Figure 7C). We conclude that  
506 PUF-3 interacts with SYGL-1 and suggest that PUF-11 likely does as well, due to the  
507 near identity between PUF-3 and PUF-11. These data plus those of the genome-wide  
508 screen (BOXEM *et al.* 2008) indicate that PUF-3 and PUF-11 likely interact physically  
509 with LST-1 and SYGL-1.

## 510 **DISCUSSION**

### 511 **Missing self-renewal regulators are PUF-3 and PUF-11**

512 Despite over three decades of research defining the regulatory network that maintains  
513 *C. elegans* germline stem cells, key self-renewal regulators were clearly missing (see  
514 Introduction, Figure 1A,B). The argument was simple. Animals lacking GLP-1/Notch  
515 signaling from the niche or lacking the two key GLP-1/Notch targets, *lst-1* and *sygl-1*,  
516 have a much earlier GSC defect than animals lacking the only other known self-renewal  
517 regulators, FBF-1 and FBF-2. Because LST-1 and SYGL-1 proteins interact physically  
518 with FBF-1 and FBF-2 (SHIN *et al.* 2017; HAUPT *et al.* 2019; QIU *et al.* 2019) and that  
519 interaction is essential for GSC self-renewal (HAUPT *et al.* 2019), we predicted that the  
520 missing regulators might be additional PUF RNA-binding proteins. Indeed, we report  
521 here that animals lacking four PUF proteins, PUF-3 and PUF-11 in addition to FBF-1  
522 and FBF-2, exhibit the same early GSC defect as *glp-1* null mutants (Figure 7D). The  
523 *fbf-1 fbf-2; puf-3 puf-11* germ cell number is equivalent to that of *glp-1* null at 15° and  
524 25°. At 20°, the quadruple mutant undergoes one additional GSC division, which is a  
525 minor difference (one temperature, one cell division). Thus, PUF-3 and PUF-11 are the  
526 major missing self-renewal regulators.

527 In the process of characterizing *puf-3* and *puf-11* as self-renewal regulators, we  
528 confirmed their primary role in oogenesis. Previous studies using RNAi directed against  
529 *puf-3/11* had identified their function in oogenesis – namely, to produce viable embryos  
530 (HUBSTENBERGER *et al.* 2012). Our work extends that previous study in three ways.  
531 Using deletion mutants of each gene, we find that PUF-3 and PUF-11 act redundantly  
532 during oogenesis; using tagged versions of each protein, we show that both are  
533 expressed in oocytes; and using genetics, we find that PUF-3 and PUF-11 are not  
534 required for spermatogenesis. Importantly, while their oogenesis function is exclusive to

535 hermaphrodites, their role in GSC self-renewal is critical in both hermaphrodites and  
536 males and thus is gender-independent. Their molecular mechanism of action in both  
537 GSCs and oocytes likely revolves around RNA regulation, a common theme among  
538 PUF proteins. Regardless, we emphasize that PUF-3 and PUF-11 are the long-sought  
539 missing self-renewal regulators.

#### 540 **A “PUF hub” is responsible for GSC self-renewal**

541 Regulatory networks are central to cell fates and tissue patterning across animal  
542 phylogeny. For germline fates and patterning, regulatory networks that rely on post-  
543 transcriptional regulation have emerged as particularly prominent (e.g. KIMBLE AND  
544 CRITTENDEN 2007; SLAIDINA AND LEHMANN 2014; YAMAJI *et al.* 2017), with key RNA-  
545 binding proteins regulating hundreds of RNAs and directing cell fate programs  
546 (KERSHNER AND KIMBLE 2010; AOKI *et al.* 2018; PORTER *et al.* 2019; this work). This work  
547 reveals that PUF RNA-binding proteins are principle intrinsic regulators in the stem cell  
548 network. Four PUFs collectively drive GSC self-renewal in hermaphrodites and males,  
549 in larvae and adults and at all laboratory growth temperatures (15°, 20° and 25°). The  
550 centrality of PUF proteins to the GSC regulatory network is underscored by the fact that  
551 GSC defects of *fbf-1 fbf-2; puf-3 puf-11* quadruple null mutants are virtually identical to  
552 those of *glp-1/Notch* null and *lst-1 sygl-1* null mutants (Figure 7D).

553 The remarkable phenotypic congruence of mutants in niche signaling, its targets  
554 LST-1 and SYGL-1, and four PUF proteins leads us to propose the concept of a “PUF  
555 self-renewal hub” in the stem cell regulatory network (Figure 7E). This hub consists of  
556 four PUF RNA-binding proteins and two PUF partner proteins, LST-1 and SYGL-1. LST-  
557 1 and SYGL-1 were first identified as partners of FBF (SHIN *et al.* 2017; HAUPT *et al.*  
558 2019; QIU *et al.* 2019), but PUF-3 and PUF-11 also likely partner with LST-1 and SYGL-  
559 1 (BOXEM *et al.* 2008; this work). Moreover, these PUF partnerships are essential for  
560 GSC self-renewal (HAUPT *et al.* 2019; C.R. Kanzler and H.J. Shin, unpublished). The  
561 PUF hub therefore serves as the principal node for GSC self-renewal in the stem cell  
562 regulatory network

563 The PUF hub seems remarkably simple and is strongly supported by genetic and  
564 molecular analyses. However, puzzles remain. For example, mutants in the *fog-1* gene,  
565 which encodes a CPEB-related RNA-binding protein, also enhance the GSC defect of

566 *fbf-1 fbf-2* double mutants, but that enhancement is coupled to a reversal in germline  
567 sex and the mechanism remains a mystery (THOMPSON *et al.* 2005). In contrast, as  
568 emphasized here, the “PUF hub” GSC phenotype is not coupled to any effect on  
569 germline sex determination, but instead is equivalent to removal of niche signaling  
570 (KERSHNER *et al.* 2014; this work). Most other intrinsic stem cell regulators do not meet  
571 this high bar of equivalence to the niche-defective phenotype. Thus, the PUF hub  
572 promises to provide a paradigm for understanding self-renewal hubs more broadly.

### 573 **Redundancy and buffering within the PUF hub**

574 The PUF hub relies on a striking nexus of functional redundancies. PUF-3 and PUF-11  
575 are redundant with FBF during larval development and in adults at 25° (this work); and  
576 FBF-1 and FBF-2 are redundant with each other in late larval development at 15° and  
577 20° (CRITTENDEN *et al.* 2002). Moreover, the two PUF partners, LST-1 and SYGL-1, are  
578 functionally redundant (KERSHNER *et al.* 2014; SHIN *et al.* 2017). These layers of  
579 redundancy, together with our molecular understanding of individual hub proteins,  
580 suggests a simple molecular model (Figure 7F). In this model, each PUF protein binds  
581 to target RNAs via 3'UTR regulatory elements and also binds to either LST-1 or SYGL-1  
582 to elicit RNA repression. Evidence for this model is particularly strong for the FBFs,  
583 whose mode of action has been analyzed most intensively (BERNSTEIN *et al.* 2005;  
584 WANG *et al.* 2009; SHIN *et al.* 2017; HAUPT *et al.* 2019). Data are also strongly  
585 suggestive for the nearly identical PUF-3 and PUF-11 proteins: PUF-11 binds to RNA  
586 with a sequence specificity similar to that of FBF (KOH *et al.* 2009); PUF-3/-11 repress  
587 expression of reporter RNAs in oocytes (HUBSTENBERGER *et al.* 2012); PUF-11 interacts  
588 with LST-1 in yeast (BOXEM *et al.* 2008); and PUF-3 interacts with SYGL-1 in yeast (this  
589 work). While further analyses are needed, outlines of the hub architecture and definition  
590 of its key molecular features are clear.

591 The extensive redundancy among hub components suggests that components  
592 are, to a first approximation, molecularly interchangeable. That interchangeability likely  
593 renders the hub robust, namely capable of maintaining stem cells under many  
594 conditions (e.g. developmental stage, growth temperature, sex). Although not yet  
595 analyzed, the interchangeability may also help stem cells withstand the barrage of  
596 environmental inputs and stresses experienced outside the laboratory. A similar

597 phenomenon of functional redundancy of key regulators has been found in other  
598 developmental regulatory networks (e.g. Hox genes in animal development, MAD box  
599 genes in plant development) and likely lies at the heart of network evolution more  
600 broadly (WAGNER 2008).

601 In addition to functional redundancy, single hub components likely have  
602 specialized individual roles. Intensive studies of FBF-1 and FBF-2 reveal numerous  
603 individual features (LAMONT *et al.* 2004; VORONINA *et al.* 2012; VORONINA 2013; BRENNER  
604 AND SCHEDL 2016; PRASAD *et al.* 2016; WANG *et al.* 2016; PORTER *et al.* 2019). FBF-1  
605 and FBF-2 have distinct low penetrance sex determination defects, genetic interactions,  
606 expression, subcellular localization, target RNAs and FBF-specific molecular effects on  
607 targets. PUF-3 and PUF-11 will also likely possess differences, between each other and  
608 also with the FBFs. Understanding the common and unique roles among the members  
609 of the hub will be crucial to understanding how the hub is buffered to maintain stem cells  
610 under a variety of physiological and environmental conditions.

## 611 **ACKNOWLEDGEMENTS**

612 We thank Peggy Kroll-Conner for help generating strains central to this work as well as  
613 isolation of the *puf-3(q801)* deletion, Maureen Barr for sharing her mutagenesis library,  
614 and the Million Mutations Project for generating *puf-11(gk203683)*. We thank Susan  
615 Strome (University of California, Santa Cruz) for  $\alpha$ -PGL-1 and  $\alpha$ -SP56 antibodies. We  
616 are also grateful to Sarah Crittenden and Brian Carrick for comments on the manuscript,  
617 Laura Vanderploeg for help with figures and Carol Pfeffer for help with manuscript  
618 preparation. Some strains used in the study were provided by the *Caenorhabditis*  
619 Genetics Center, supported by the NIH Office of Research Infrastructure Programs (P40  
620 OD010440).

## 621 **COMPETING INTERESTS**

622 The authors declare no competing interests.

623 **FUNDING**

624 This work was supported by the National Institutes of Health [GM050942 to M.W.]; J.K.  
625 was an Investigator with the Howard Hughes Medical Institute.

626 **FIGURE LEGENDS**

627 **Figure 1: *puf-3* and *puf-11* are putative missing GSC regulators**

628 **A.** Diagram illustrating functional relationships between key genes that regulate stem  
629 cell self-renewal and differentiation in *C. elegans* germline stem cells (GSCs). Gene X  
630 (red) represents a missing factor that likely functions in parallel to *fbf-1* and *fbf-2*.

631 **B.** Total number of germ cells (GC) per animal at 20° in wild-type (wt) and mutants of  
632 GSC regulators: *fbf-1 fbf-2*, *lst-1 sygl-1* and *glp-1* mutants (AUSTIN AND KIMBLE 1987;  
633 CRITTENDEN *et al.* 2002; KIMBLE AND CRITTENDEN 2005; CRITTENDEN *et al.* 2006;  
634 KERSHNER *et al.* 2014). X-axis: L1-L4, larval stages of development; ticks mark molts  
635 between stages. Alleles used here and throughout this work are *fbf-1(ok91)*, *fbf-*  
636 *2(q704)*, *glp-1(q46)*, *lst-1(ok814)* and *sygl-1(tm5040)*.

637 **C.** Total GC number produced per animal. Animals of each strain were staged to 36  
638 hours (15°), 24 hours (20°) or 18 hours (25°) past mid-L4 for this experiment. In  
639 germlines where distal germ cells had differentiated to mature sperm, GC number was  
640 determined by counting sperm number and dividing by four. GC number were not  
641 counted in larger germlines that retained a progenitor zone; these were scored as  
642 “many & still dividing”. Alleles are identical to Figure 1B except for *lst-1(q869)* and *sygl-*  
643 *1(q828)*. n, number animals scored.

644 **D.** Schematic of *puf-3* and *puf-11* loci, which share 90% nucleotide (nt) identity  
645 (HUBSTENBERGER *et al.* 2012): exons (white boxes), introns (peaked lines), untranslated  
646 region (gray boxes), sequence encoding individual PUF repeats (blue circles),  
647 sequence targeted by RNAi clone (orange line).

648 **E.** Diagram of distal gonad with the progenitor zone (PZ) and germ cells that have  
649 entered early meiotic prophase (Diff). Distal end (asterisk); GSCs (yellow); GSC  
650 daughters primed for differentiation and transitioning toward entry into meiotic prophase,

651 including those in meiotic S-phase (graded yellow to green); early meiotic prophase  
652 (green, crescent-shaped).

653 **F,G.** Representative images of extruded gonads from 25° *fbf-1 fbf-2* adult  
654 hermaphrodites staged to 18 hours after L4 on either empty vector control (F) or *puf-*  
655 *3/11* RNAi clone B (G). Gonads are immunostained with a sperm marker SP56 (red)  
656 and DAPI (cyan). Images are Z-projections of several fluorescent images obtained on a  
657 compound microscope. A dotted line delineates the gonad boundary and an asterisk  
658 marks the distal end. Double headed arrow (yellow) indicates the PZ. Scale bar in F  
659 applies to both images.

660 **H.** State of distal germ cells of *fbf-1 fbf-2* hermaphrodites and *fbf-1 fbf-2; him-5* males,  
661 raised at 25° on either empty or *puf-3/11* RNAi and staged to adulthood, 18 hours after  
662 L4. States were determined by DAPI-stained chromosomal morphology, scoring for a  
663 PZ or mature sperm in the distal germline. *him-5(e1490)* increased the frequency of  
664 male progeny (HODGKIN *et al.* 1979).

665 **I.** Quantitation of total GC per animal from experiment in (H) by counting sperm number  
666 and dividing by four. In germlines with a PZ, GC numbers were not counted but  
667 appeared comparable to previous reports of >100 (MERRITT AND SEYDOUX 2010; SHIN *et*  
668 *al.* 2017). RNAi treatment on x-axis: empty vector (e), *puf-3/11* RNAi clone A (A) or *puf-*  
669 *3/11* RNAi clone B (B). Individual data points are plotted as circles; middle line is  
670 median value.

671 **Figure 2: GSC maintenance defects are undetectable in single and double *puf-3***  
672 **and *puf-11* mutants**

673 **A.** *puf-3* and *puf-11* loci, using conventions as in Figure 1D. Extents of deletion mutants  
674 are bracketed below loci and position of the point mutation is marked with an asterisk  
675 above. See Figure S2 for sequence details.

676 **B.** Germline-related characteristics of single and double *puf-3* and *puf-11* mutants. See  
677 Methods for details about assays and scoring.

678 **C,D.** Representative confocal Z-projections of DAPI-stained gonads extruded from  
679 animals staged to 24 hours after L4 at 20°. Extent of progenitor zone (PZ), double  
680 headed yellow arrow. Annotation by convention in Figure 1F,G and scale bar in C  
681 applies to D.

682 **E,F.** PZ sizes measured in number of germ cells (GC).

683 **F.** PZ sizes showing individual data points as circles; middle line, median; boxes, 25-  
684 75% quantile; whiskers, minimum and maximum values.  $n=5$  gonad arms for each  
685 sample.  $p$ -values, mutants were compared to wild-type using Welch's ANOVA and  
686 Games-Howell *post hoc* test.

687 **Figure 3: Triple and quadruple mutants reveal *puf-3* and *puf-11* role in GSC**  
688 **maintenance**

689 **A.** Total germ cell (GC) number per animal in *fbf-1 fbf-2*; *puf* triple mutant adults at 20°  
690 and 25°. GC number was counted only in germlines differentiated to the distal end;  
691 those with many germ cells and retaining a progenitor zone (PZ) or having meiotic  
692 prophase nuclear morphology were scored as “many”. Where distal germ cells had  
693 differentiated to mature sperm, GC number was determined by counting sperm and  
694 then dividing by four. Individual data points are plotted as circles; middle line, median;  
695 boxes, 25-75% quantile; whiskers, minimum and maximum values falling outside the  
696 box but within 1.5 times the interquartile range. To determine  $p$ -values, triple mutants  
697 were compared to *fbf-1 fbf-2* control using Welch's ANOVA and Games-Howell *post-hoc*  
698 test; *n.s.*, not significant; \*\*  $p < 0.01$ ; \*\*\*  $p < 0.001$ ; *n/a*, not applicable. For additional  
699 information including mean GC/animal, see Figure S3.

700 **B.** State of distal germ cells in *fbf-1 fbf-2*; *puf* triple mutants at 25°, assayed in adults at  
701 18 hours past L4. State was scored as described in Figure 1H, with the additional  
702 classification of “meiotic” for cells with meiotic prophase chromosomal morphology, but  
703 not yet differentiated as sperm.

704 **C.** Graph of germ cell number per animal in *fbf-1 fbf-2*; *puf-3 puf-11* adults at 15°, 20°  
705 and 25°. Germline scoring and graph conventions as in Figure 3A. Individual data points  
706 are plotted as circles.  $p$ -value compared to respective *fbf-1 fbf-2* control was determined  
707 using Welch's ANOVA and Games-Howell *post-hoc* test; \*\*\*  $p < 0.001$ ; *n/a*, not  
708 applicable. For additional information including mean GC/animal, see Figure S3.

709 **D,E.** Representative images of DAPI-stained gonads extruded from wild-type (D) or *puf-*  
710 *3(q966) puf-11(q971)* (E) adult hermaphrodites treated with *fbf-1/2* RNAi at 25°. Animals  
711 were plated to RNAi as mid-L4s and analyzed 48 hours later for changes in nuclear  
712 morphology. Nuclear morphologies indicative of PZ (double headed arrow, yellow) and



713 early meiotic prophase (green) are annotated. Other annotation by convention in Figure  
714 1F,G. Images show single confocal Z-sections and scale bar in D applies to both  
715 images.

716 **Figure 4: GSC self-renewal fails during larval development in *fbf-1 fbf-2; puf-3***  
717 ***puf-11* quadruple mutants at 20°**

718 **A-D.** Representative images of early L4 germlines stained with  $\alpha$ -PGL-1 (white), a germ  
719 cell marker. Images were obtained by fluorescent compound microscopy. The scale bar  
720 in A applies to all images. All other annotations by convention in Figure 1F,G.

721 **E,F.** Quantitation of the number of germ cells (GC) per animal across larval stages.  
722 Larvae were immunostained (as in A-D) at defined developmental timepoints: early L1  
723 (eL1), early L2 (eL2), late L2 and early L4 (eL4) stages. Germ cell number was counted  
724 as number of PGL-1-positive cells for all timepoints except early L1 was scored live by  
725 DIC microscopy.

726 **E.** Bars show the mean number of germ cells per sample with genotypes color coded as  
727 shown. Each individual data point is plotted as a gray circle. nd, not done: germ cells in  
728 *glp-1* animals at early L4 stage had already differentiated to sperm and were thus not  
729 scored; the striped bar in early L4 is replicated from the late L2 mean value for *glp-1*.

730 **F.** Table with mean number of germ cells (GC) per animal.

731 **A-F.** Alleles are as follows: *fbf-1(ok91)*, *fbf-2(q704)*, *puf-3(q966)*, *puf-11(q971)*, *glp-*  
732 *1(q46)*.

733 **Figure 5: PUF-3 and PUF-11 are expressed in distal germline, including GSCs**

734 **A.** Schematic of *puf-3* and *puf-11* loci with sites of epitope tags annotated, by  
735 convention as in Figure 1D. Inverted triangles denote insertion sites of 3xV5 epitope  
736 tags, which are flanked both up- and downstream by a GS linker. See Figure S2 for a  
737 more detailed sequence annotation.

738 **B-G.** Representative images of PUF-3<sup>V5</sup> and PUF-11<sup>V5</sup> expression in gonads extruded  
739 from L4 hermaphrodites raised at 20°. Gonads from *puf-3(q1058)* (B,E), *puf-11(q1128)*  
740 (C,F) and wild-type control (D,G) were stained with  $\alpha$ -V5 (magenta) and DAPI (cyan)  
741 and then imaged by confocal microscopy. B-D are Z-projections. V5 signal intensity  
742 (int.) was adjusted uniformly in Adobe Photoshop across images, and high or low

743 intensities are indicated at left. E-G are single Z-slices selected from a middle plane of  
744 the same gonads imaged above; white arrowheads in insets mark representative  
745 cytoplasmic granules. Scale bar in B applies to all images except the insets, where  
746 scale bars are 2  $\mu\text{m}$ . Other image annotation conventions as in Figure 1F,G.

747 **H,I.** Quantitation of V5 intensity in the distal region of PUF-3<sup>V5</sup> (light pink), PUF-11<sup>V5</sup>  
748 (dark pink) and wild-type (gray) extruded gonads, determined using Fiji/ImageJ (see  
749 Methods for details). Each bar represents the mean  $\alpha$ -V5 immunostaining intensity in  
750 arbitrary units (a.u.) in the distal-most 50  $\mu\text{m}$  of the gonad ( $\sim$ 11 germ cell diameters  
751 (gcd) using the conversion 4.4  $\mu\text{m}/\text{gcd}$ . (LEE *et al.* 2016)), with nonspecific staining  
752 background from the wild-type control subtracted. Error bars represent standard error.

753 **H.** Analysis of mid-L4 staged extruded germlines at 20°. Four independent experiments  
754 were performed for a total of at least 27 gonads per genotype.

755 **I.** Analysis of germlines extruded from staged adults at 20° (24 hours past mid-L4) and  
756 25° (18 hours past mid-L4). Two independent experiments were performed for a total of  
757 24 gonads per experimental condition. For representative images at 20°, see Figures  
758 S4E-G.

759 **Figure 6: *puf-3 puf-11* lie parallel to *fbf-1 fbf-2* in the GSC regulatory pathway**

760 **A.** Results of epistasis tests conducted with *lst-1(gf)* and *sygl-1(gf)* alleles. Number of  
761 germ cells (GC) in Glp animals was determined by counting sperm in adults and  
762 dividing by four. Genotype for *lst-1(gf)* strain is *lst-1(ok814); qSi267 [Pmex-5::LST-*  
763 *1::3xFLAG::tbb-2 3' end] fbf-1(ok91) fbf-2(q704)* and *sygl-1(gf)* is *sygl-1(tm5040);*  
764 *qSi235 [Pmex-5::SYGL-1::3xFLAG::tbb-2 3' end] fbf-1(ok91) fbf-2(q704)*. We used the  
765 *puf-3/11* RNAi clone B in these experiments. Images of representative germlines are  
766 available in Figure S5A-D.

767 **B.** Results of epistasis tests conducted with *gld-1 gld-2*. Genotype is *gld-2(q497) gld-*  
768 *1(q361); fbf-1(ok91) fbf-2(q704)*. We used the *puf-3/11* RNAi clone B in these  
769 experiments. Images of representative germlines are available in Figure S5E,F.

770 **C.** Revised pathway for GSC regulation that includes *puf-3* and *puf-11* at the same  
771 position in the pathway as *fbf-1* and *fbf-2* (blue circle).

772 **Figure 7: PUFs and FBFs comprise a PUF hub that accounts for GSC self-renewal**

773 **A.** Yeast two-hybrid schematic. SYGL-1 was fused to the Gal4 activation domain (AD),  
774 which was HA tagged. PUF protein variants were fused to the LexA binding domain  
775 (BD), which was V5 tagged. PUF constructs included the PUF repeats and some  
776 flanking amino acids; for amino acid boundaries, see Methods. Interaction between  
777 SYGL-1 and PUF drives transcription of a *lacZ* ( $\beta$ -gal) reporter.

778 **B.** SYGL-1/PUF interaction was measured using  $\beta$ -galactosidase ( $\beta$ -gal) activity. Each  
779 bar is the mean of at least 3 experiments. Individual data points are plotted as gray  
780 circles.

781 **C.** Western blot from yeast lysate probed with  $\alpha$ -V5 to detect AD fusion proteins and  $\alpha$ -  
782 HA to detect BD fusion proteins. Actin was the loading control.

783 **D.** Total number of germ cells (GC) per animal at 20° in mutants of key GSC regulators,  
784 revised from Figure 1B to include *fbf-1 fbf-2*; *puf-3 puf-11* (red triangles).

785 **E.** The PUF hub for GSC self-renewal consists of two PUF partners that are direct  
786 targets of niche signaling and four PUF RNA-binding proteins that collectively regulate a  
787 battery of mRNAs.

788 **F.** Molecular model for GSC self-renewal: PUF RNA-binding protein binds to the 3' UTR  
789 of target mRNAs. A PUF partner, LST-1 or SYGL-1, ensures RNA repression by an  
790 unknown mechanism.

791 **REFERENCES**

- 792 Angelo, G., and M. R. Van Gilst, 2009 Starvation protects germline stem cells and  
793 extends reproductive longevity in *C. elegans*. *Science* 326: 954-958.
- 794 Aoki, S. T., D. F. Porter, A. Prasad, M. Wickens, C. A. Bingman *et al.*, 2018 An RNA-  
795 binding multimer specifies nematode sperm fate. *Cell Rep* 23: 3769-3775.
- 796 Arribere, J. A., R. T. Bell, B. X. Fu, K. L. Artiles, P. S. Hartman *et al.*, 2014 Efficient  
797 marker-free recovery of custom genetic modifications with CRISPR/Cas9 in  
798 *Caenorhabditis elegans*. *Genetics* 198: 837-846.
- 799 Austin, J., and J. Kimble, 1987 *glp-1* is required in the germ line for regulation of the  
800 decision between mitosis and meiosis in *C. elegans*. *Cell* 51: 589-599.
- 801 Bartel, P. L., and S. Fields (Editors), 1997 *The Yeast Two-Hybrid System*. Oxford  
802 University Press, New York.
- 803 Bernstein, D., B. Hook, A. Hajarnavis, L. Opperman and M. Wickens, 2005 Binding  
804 specificity and mRNA targets of a *C. elegans* PUF protein, FBF-1. *RNA* 11: 447-  
805 458.

- 806 Boxem, M., Z. Maliga, N. Klitgord, N. Li, I. Lemmens *et al.*, 2008 A protein domain-  
807 based interactome network for *C. elegans* early embryogenesis. *Cell* 134: 534-  
808 545.
- 809 Boyer, L. A., T. I. Lee, M. F. Cole, S. E. Johnstone, S. S. Levine *et al.*, 2005 Core  
810 transcriptional regulatory circuitry in human embryonic stem cells. *Cell* 122: 947-  
811 956.
- 812 Brenner, J. L., and T. Schedl, 2016 Germline stem cell differentiation entails regional  
813 control of cell fate regulator GLD-1 in *Caenorhabditis elegans*. *Genetics* 202:  
814 1085-1103.
- 815 Brenner, S., 1974 The genetics of *Caenorhabditis elegans*. *Genetics* 77: 71-94.
- 816 Crittenden, S. L., D. S. Bernstein, J. L. Bachorik, B. E. Thompson, M. Gallegos *et al.*,  
817 2002 A conserved RNA-binding protein controls germline stem cells in  
818 *Caenorhabditis elegans*. *Nature* 417: 660-663.
- 819 Crittenden, S. L., K. A. Leonhard, D. T. Byrd and J. Kimble, 2006 Cellular analyses of  
820 the mitotic region in the *Caenorhabditis elegans* adult germ line. *Molecular*  
821 *Biology of the Cell* 17: 3051-3061.
- 822 Crittenden, S. L., H. S. Seidel and J. Kimble, 2017 Analysis of the *C. elegans* germline  
823 stem cell pool. *Methods Mol Biol* 1463: 1-33.
- 824 Eckmann, C. R., S. L. Crittenden, N. Suh and J. Kimble, 2004 GLD-3 and control of the  
825 mitosis/meiosis decision in the germline of *Caenorhabditis elegans*. *Genetics*  
826 168: 147-160.
- 827 Edelstein, A., N. Amodaj, K. Hoover, R. Vale and N. Stuurman, 2010 Computer control  
828 of microscopes using microManager. *Curr Protoc Mol Biol* Chapter 14: Unit14 20.
- 829 Edelstein, A. D., M. A. Tsuchida, N. Amodaj, H. Pinkard, R. D. Vale *et al.*, 2014  
830 Advanced methods of microscope control using  $\mu$ Manager software. *J Biol*  
831 *Methods* 1.
- 832 Edgley, M. L., D. L. Baillie, D. L. Riddle and A. M. Rose, 2006 Genetic balancers.  
833 *WormBook*: 1-32.
- 834 Edgley, M. L., and D. L. Riddle, 2001 LG II balancer chromosomes in *Caenorhabditis*  
835 *elegans*: *mT1(II;III)* and the *mIn1* set of dominantly and recessively marked  
836 inversions. *Mol Genet Genomics* 266: 385-395.
- 837 Finney, M., and G. Ruvkun, 1990 The *unc-86* gene product couples cell lineage and cell  
838 identity in *C. elegans*. *Cell* 63: 895-905.
- 839 Forbes, A., and R. Lehmann, 1998 Nanos and Pumilio have critical roles in the  
840 development and function of *Drosophila* germline stem cells. *Development* 125:  
841 679-690.
- 842 Fraser, A. G., R. S. Kamath, P. Zipperlen, M. Martinez-Campos, M. Sohrmann *et al.*,  
843 2000 Functional genomic analysis of *C. elegans* chromosome I by systematic  
844 RNA interference. *Nature* 408: 325-330.
- 845 Frøkjær-Jensen, C., M. W. Davis, M. Sarov, J. Taylor, S. Flibotte *et al.*, 2014 Random  
846 and targeted transgene insertion in *Caenorhabditis elegans* using a modified  
847 *Mos1* transposon. *Nat Methods* 11: 529-534.
- 848 Gibson, D. G., 2009 Synthesis of DNA fragments in yeast by one-step assembly of  
849 overlapping oligonucleotides. *Nucleic Acids Res* 37: 6984-6990.

- 850 Gibson, D. G., L. Young, R. Y. Chuang, J. C. Venter, C. A. Hutchison, 3rd *et al.*, 2009  
851 Enzymatic assembly of DNA molecules up to several hundred kilobases. *Nat*  
852 *Methods* 6: 343-345.
- 853 Gietz, R. D., and R. H. Schiestl, 2007 High-efficiency yeast transformation using the  
854 LiAc/SS carrier DNA/PEG method. *Nat Protoc* 2: 31-34.
- 855 Gross-Thebing, T., S. Yigit, J. Pfeiffer, M. Reichman-Fried, J. Bandemer *et al.*, 2017  
856 The Vertebrate Protein Dead End Maintains Primordial Germ Cell Fate by  
857 Inhibiting Somatic Differentiation. *Dev Cell* 43: 704-715 e705.
- 858 Hafner, M., M. Landthaler, L. Burger, M. Khorshid, J. Hausser *et al.*, 2010  
859 Transcriptome-wide identification of RNA-binding protein and microRNA target  
860 sites by PAR-CLIP. *Cell* 141: 129-141.
- 861 Haupt, K. A., A. L. Enright, A. S. Ferdous, A. M. Kershner, H. Shin *et al.*, 2019 The  
862 molecular basis of LST-1 self-renewal activity and its control of stem cell pool  
863 size. *Development*.
- 864 Hodgkin, J., H. R. Horvitz and S. Brenner, 1979 Nondisjunction mutants of the  
865 nematode *Caenorhabditis elegans*. *Genetics* 91: 67-94.
- 866 Hook, B., D. Bernstein, B. Zhang and M. Wickens, 2005 RNA-protein interactions in the  
867 yeast three-hybrid system: affinity, sensitivity, and enhanced library screening.  
868 *RNA* 11: 227-233.
- 869 Hubstenberger, A., C. Cameron, R. Shtofman, S. Gutman and T. C. Evans, 2012 A  
870 network of PUF proteins and Ras signaling promote mRNA repression and  
871 oogenesis in *C. elegans*. *Dev Biol* 366: 218-231.
- 872 Hubstenberger, A., S. L. Noble, C. Cameron and T. C. Evans, 2013 Translation  
873 repressors, an RNA helicase, and developmental cues control RNP phase  
874 transitions during early development. *Dev Cell* 27: 161-173.
- 875 Kadyk, L. C., and J. Kimble, 1998 Genetic regulation of entry into meiosis in  
876 *Caenorhabditis elegans*. *Development* 125: 1803-1813.
- 877 Kershner, A., S. L. Crittenden, K. Friend, E. B. Sorensen, D. F. Porter *et al.*, 2013  
878 Germline stem cells and their regulation in the nematode *Caenorhabditis*  
879 *elegans*. *Adv Exp Med Biol* 786: 29-46.
- 880 Kershner, A. M., and J. Kimble, 2010 Genome-wide analysis of mRNA targets for  
881 *Caenorhabditis elegans* FBF, a conserved stem cell regulator. *Proceedings of*  
882 *the National Academy of Sciences of the United States of America* 107: 3936-  
883 3941.
- 884 Kershner, A. M., H. Shin, T. J. Hansen and J. Kimble, 2014 Discovery of two GLP-  
885 1/Notch target genes that account for the role of GLP-1/Notch signaling in stem  
886 cell maintenance. *Proc Natl Acad Sci U S A* 111: 3739-3744.
- 887 Kimble, J., and S. L. Crittenden, 2005 Germline proliferation and its control, pp. in  
888 *WormBook*, edited by The *C. elegans* Research Community. *WormBook*.
- 889 Kimble, J., and S. L. Crittenden, 2007 Controls of germline stem cells, entry into  
890 meiosis, and the sperm/oocyte decision in *Caenorhabditis elegans*. *Annual*  
891 *Review of Cell and Developmental Biology* 23: 405-433.
- 892 Kimble, J. E., and J. G. White, 1981 On the control of germ cell development in  
893 *Caenorhabditis elegans*. *Developmental Biology* 81: 208-219.
- 894 Koh, Y. Y., L. Opperman, C. Stumpf, A. Mandan, S. Keles *et al.*, 2009 A single *C.*  
895 *elegans* PUF protein binds RNA in multiple modes. *RNA* 15: 1090-1099.

- 896 Lamont, L. B., S. L. Crittenden, D. Bernstein, M. Wickens and J. Kimble, 2004 FBF-1  
897 and FBF-2 regulate the size of the mitotic region in the *C. elegans* germline. *Dev*  
898 *Cell* 7: 697-707.
- 899 Lee, C., E. B. Sorensen, T. R. Lynch and J. Kimble, 2016 *C. elegans* GLP-1/Notch  
900 activates transcription in a probability gradient across the germline stem cell pool.  
901 *Elife* 5: e18370.
- 902 Lin, H., and A. C. Spradling, 1997 A novel group of *pumilio* mutations affects the  
903 asymmetric division of germline stem cells in the *Drosophila* ovary. *Development*  
904 124: 2463-2476.
- 905 Liu, Q., C. Stumpf, C. Thomas, M. Wickens and E. S. Haag, 2012 Context-dependent  
906 function of a conserved translational regulatory module. *Development* 139: 1509-  
907 1521.
- 908 Merritt, C., D. Rasoloson, D. Ko and G. Seydoux, 2008 3' UTRs are the primary  
909 regulators of gene expression in the *C. elegans* germline. *Current Biology* 18:  
910 1476-1482.
- 911 Merritt, C., and G. Seydoux, 2010 The Puf RNA-binding proteins FBF-1 and FBF-2  
912 inhibit the expression of synaptonemal complex proteins in germline stem cells.  
913 *Development* 137: 1787-1798.
- 914 Miller, D. M., and D. C. Shakes, 1995 Immunofluorescence microscopy, pp. 365-394 in  
915 *Caenorhabditis elegans: Modern Biological Analysis of an Organism*, edited by  
916 Henry F. Epstein and Diane C. Shakes. Academic Press, Inc., San Diego.
- 917 Naudin, C., A. Hattabi, F. Michelet, A. Miri-Nezhad, A. Benyoucef *et al.*, 2017  
918 PUMILIO/FOXP1 signaling drives expansion of hematopoietic stem/progenitor  
919 and leukemia cells. *Blood* 129: 2493-2506.
- 920 Paix, A., A. Folkmann, D. Rasoloson and G. Seydoux, 2015 High efficiency, homology-  
921 directed genome editing in *Caenorhabditis elegans* using CRISPR-Cas9  
922 ribonucleoprotein complexes. *Genetics* 201: 47-54.
- 923 Porter, D. F., A. Prasad, B. H. Carrick, P. Kroll-Connor, M. Wickens *et al.*, 2019 Toward  
924 identifying subnetworks from FBF binding landscapes in *Caenorhabditis*  
925 spermatogenic or oogenic germlines. *G3 (Bethesda)* 9: 153-165.
- 926 Prasad, A., D. F. Porter, P. L. Kroll-Conner, I. Mohanty, A. R. Ryan *et al.*, 2016 The  
927 PUF binding landscape in metazoan germ cells. *RNA* 22: 1026-1043.
- 928 Preibisch, S., S. Saalfeld and P. Tomancak, 2009 Globally optimal stitching of tiled 3D  
929 microscopic image acquisitions. *Bioinformatics* 25: 1463-1465.
- 930 Qiu, C., V. D. Bhat, S. Rajeev, C. Zhang, A. E. Lasley *et al.*, 2019 A crystal structure of  
931 a collaborative RNA regulatory complex reveals mechanisms to refine target  
932 specificity. *Elife* 8.
- 933 Salvetti, A., L. Rossi, A. Lena, R. Batistoni, P. Deri *et al.*, 2005 *DjPum*, a homologue of  
934 *Drosophila Pumilio*, is essential to planarian stem cell maintenance.  
935 *Development* 132: 1863-1874.
- 936 Schindelin, J., I. Arganda-Carreras, E. Frise, V. Kaynig, M. Longair *et al.*, 2012 Fiji: an  
937 open-source platform for biological-image analysis. *Nat Methods* 9: 676-682.
- 938 Seidel, H. S., and J. Kimble, 2011 The oogenic germline starvation response in *C.*  
939 *elegans*. *PLoS One* 6: e28074.
- 940 Seidel, H. S., and J. Kimble, 2015 Cell-cycle quiescence maintains *Caenorhabditis*  
941 *elegans* germline stem cells independent of GLP-1/Notch. *Elife* 4: e10832.

- 942 Shin, H., K. A. Haupt, A. M. Kershner, P. Kroll-Conner, M. Wickens *et al.*, 2017 SYGL-1  
943 and LST-1 link niche signaling to PUF RNA repression for stem cell maintenance  
944 in *Caenorhabditis elegans*. PLoS Genet 13: e1007121.
- 945 Siegfried, K., and J. Kimble, 2002 POP-1 controls axis formation during early  
946 gonadogenesis in *C. elegans*. Development 129: 443-453.
- 947 Slaidina, M., and R. Lehmann, 2014 Translational control in germline stem cell  
948 development. J Cell Biol 207: 13-21.
- 949 Thompson, B. E., D. S. Bernstein, J. L. Bachorik, A. G. Petcherski, M. Wickens *et al.*,  
950 2005 Dose-dependent control of proliferation and sperm specification by FOG-  
951 1/CPEB. Development 132: 3471-3481.
- 952 Thompson, O., M. Edgley, P. Strasbourger, S. Flibotte, B. Ewing *et al.*, 2013 The million  
953 mutation project: A new approach to genetics in *Caenorhabditis elegans*.  
954 Genome Res 23: 1749-1762.
- 955 Timmons, L., and A. Fire, 1998 Specific interference by ingested dsRNA. Nature 395:  
956 854.
- 957 Voronina, E., 2013 The diverse functions of germline P-granules in *Caenorhabditis*  
958 *elegans*. Mol Reprod Dev 80: 624-631.
- 959 Voronina, E., A. Paix and G. Seydoux, 2012 The P granule component PGL-1 promotes  
960 the localization and silencing activity of the PUF protein FBF-2 in germline stem  
961 cells. Development 139: 3732-3740.
- 962 Wagner, A., 2008 Gene duplications, robustness and evolutionary innovations.  
963 Bioessays 30: 367-373.
- 964 Wang, X., J. McLachlan, P. D. Zamore and T. M. T. Hall, 2002 Modular recognition of  
965 RNA by a human Pumilio-homology domain. Cell 110: 501-512.
- 966 Wang, X., J. R. Olson, D. Rasoloson, M. Ellenbecker, J. Bailey *et al.*, 2016 Dynein light  
967 chain DLC-1 promotes localization and function of the PUF protein FBF-2 in  
968 germline progenitor cells. Development 143: 4643-4653.
- 969 Wang, Y., L. Opperman, M. Wickens and T. M. Hall, 2009 Structural basis for specific  
970 recognition of multiple mRNA targets by a PUF regulatory protein. Proceedings  
971 of the National Academy of Sciences of the United States of America 106:  
972 20186-20191.
- 973 Wickens, M., D. S. Bernstein, J. Kimble and R. Parker, 2002 A PUF family portrait:  
974 3'UTR regulation as a way of life. Trends in Genetics 18: 150-157.
- 975 Yamaji, M., M. Jishage, C. Meyer, H. Suryawanshi, E. Der *et al.*, 2017 DND1 maintains  
976 germline stem cells via recruitment of the CCR4-NOT complex to target mRNAs.  
977 Nature 543: 568-572.
- 978 Ye, J., and R. Blelloch, 2014 Regulation of pluripotency by RNA binding proteins. Cell  
979 Stem Cell 15: 271-280.
- 980 Zhang, B., M. Gallegos, A. Puoti, E. Durkin, S. Fields *et al.*, 1997 A conserved RNA-  
981 binding protein that regulates sexual fates in the *C. elegans* hermaphrodite germ  
982 line. Nature 390: 477-484.
- 983 Zhang, M., D. Chen, J. Xia, W. Han, X. Cui *et al.*, 2017 Post-transcriptional regulation of  
984 mouse neurogenesis by Pumilio proteins. Genes Dev 31: 1354-1369.
- 985

## Figure 1 Haupt et al

### A Germline stem cell (GSC) regulatory pathway

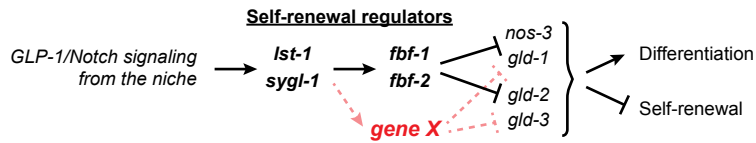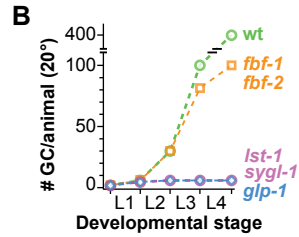

**C**

| Genotype            | # GC/animal (mean ± sd) |    |          |                       |
|---------------------|-------------------------|----|----------|-----------------------|
|                     | 15°                     | n  | 20°      | 25°                   |
| <i>glp-1</i>        | 4 ± 2                   | 20 | 3 ± 2    | 10                    |
| <i>Ist-1 sygl-1</i> | 6 ± 1                   | 10 | 5 ± 1    | 20                    |
| <i>fbf-1 fbf-2</i>  | 91 ± 20                 | 16 | 128 ± 30 | 20                    |
|                     |                         |    |          | many & still dividing |
|                     |                         |    |          | 50                    |

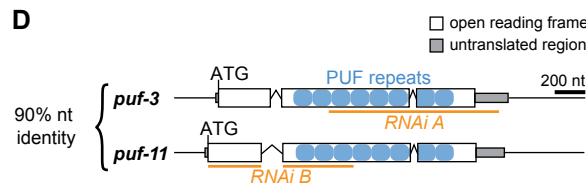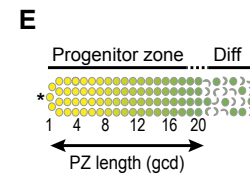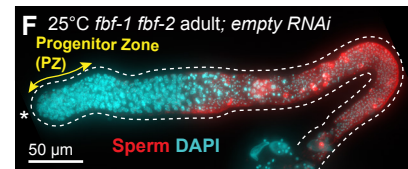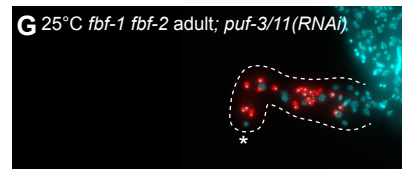

**H**

| Genotype & Sex              | RNAi              | Distal germ cells, adults at 25° |         |    |
|-----------------------------|-------------------|----------------------------------|---------|----|
|                             |                   | % PZ                             | % sperm | n  |
| <i>fbf-1 fbf-2</i> ♀        | empty             | 100                              | 0       | 21 |
|                             | <i>puf-3/11 A</i> | 13                               | 87      | 15 |
|                             | <i>puf-3/11 B</i> | 0                                | 100     | 19 |
| <i>fbf-1 fbf-2; him-5</i> ♂ | empty             | 97                               | 3       | 30 |
|                             | <i>puf-3/11 A</i> | 0                                | 100     | 8  |
|                             | <i>puf-3/11 B</i> | 18                               | 82      | 22 |

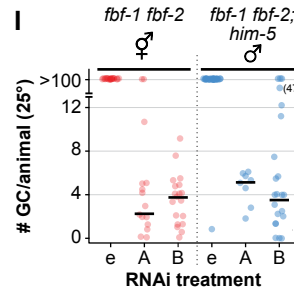



## Figure 2 Haupt et al

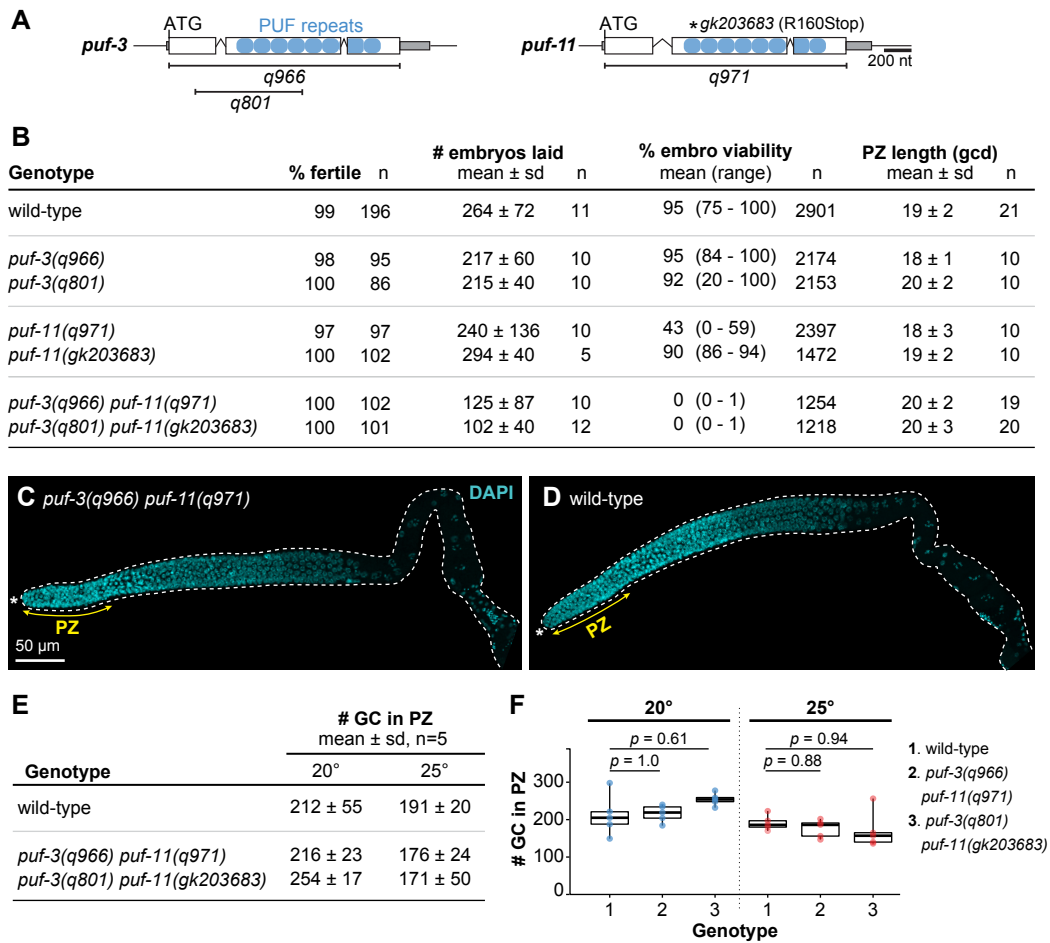

## Figure 3 Haupt et al

### A Triple mutants: Germ cell counts

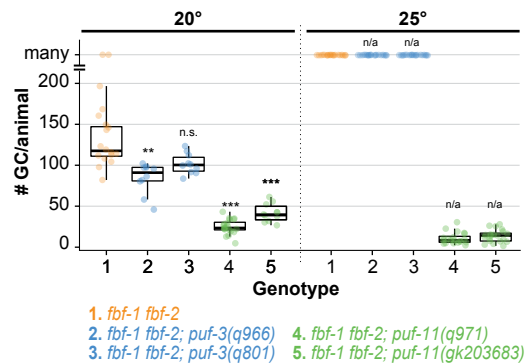

### B Triple mutants: Distal germ cell state in adults at 25°

| Genotype                             | % PZ | % meiotic | % sperm | n   |
|--------------------------------------|------|-----------|---------|-----|
| <i>fbf-1 fbf-2</i>                   | 97   | 3         | 0       | 100 |
| <i>fbf-1 fbf-2; puf-3(q966)</i>      | 34   | 64        | 2       | 85  |
| <i>fbf-1 fbf-2; puf-3(q801)</i>      | 23   | 76        | 1       | 100 |
| <i>fbf-1 fbf-2; puf-11(q971)</i>     | 0    | 0         | 100     | 100 |
| <i>fbf-1 fbf-2; puf-11(gk203683)</i> | 0    | 0         | 100     | 100 |

### C Quadruple mutants: Germ cell counts

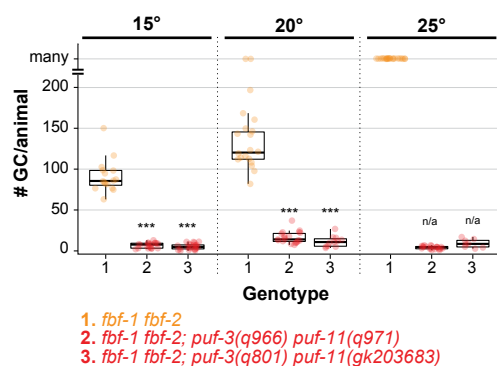

### Quadruple mutants: Adult distal germline at 25°

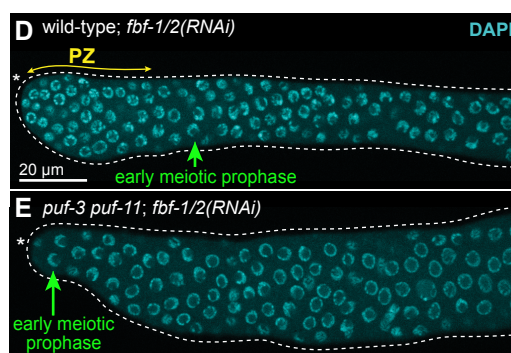

**Figure 4**  
**Haupt et al**

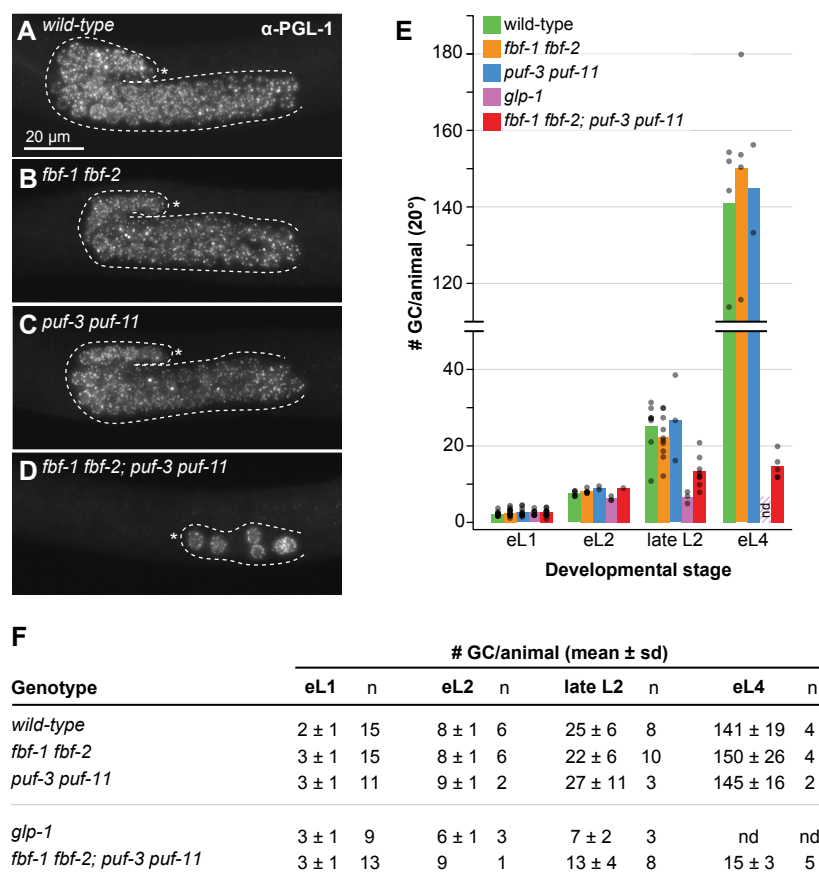

## Figure 5 Haupt et al

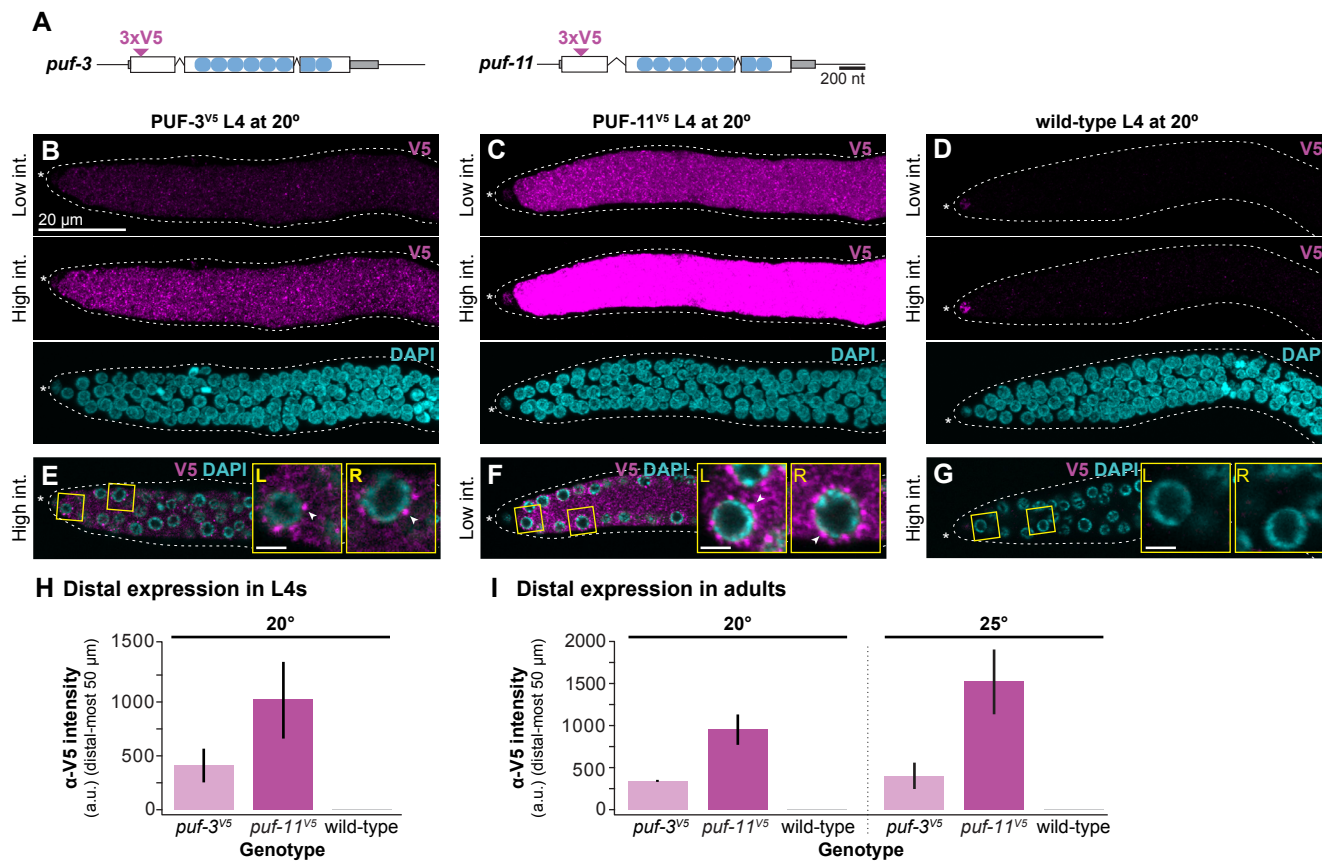

## Figure 6 Haupt et al

**A**

| Genotype                       | RNAi            | % pGlp <sup>1</sup> | % Glp <sup>2</sup> | n   | # GC/animal<br>mean ± sd | n   |
|--------------------------------|-----------------|---------------------|--------------------|-----|--------------------------|-----|
| <i>lst-1(gf); fbf-1 fbf-2</i>  | empty           | 100                 | 0                  | 106 | n/a                      | n/a |
|                                | <i>puf-3/11</i> | 24                  | 76                 | 29  | 5 ± 3                    | 22  |
| <i>sygl-1(gf); fbf-1 fbf-2</i> | empty           | 100                 | 0                  | 87  | n/a                      | n/a |
|                                | <i>puf-3/11</i> | 17                  | 83                 | 24  | 3 ± 2                    | 20  |

1. pGlp, partial Glp phenotype; germ cell number similar to *fbf-1 fbf-2* double mutant.

2. Glp, tiny germlines with only a few sperm; germ cell number similar to *glp-1* null.

**B**

| Genotype                        | RNAi            | % tumor <sup>1</sup> | % Glp <sup>2</sup> | n  |
|---------------------------------|-----------------|----------------------|--------------------|----|
| <i>gld-1 gld-2; fbf-1 fbf-2</i> | empty           | 100                  | 0                  | 25 |
|                                 | <i>puf-3/11</i> | 100                  | 0                  | 28 |

1. Tumorous germlines are vastly overproliferating.

2. Glp, tiny germlines with only a few sperm; germ cell number similar to *glp-1* null.

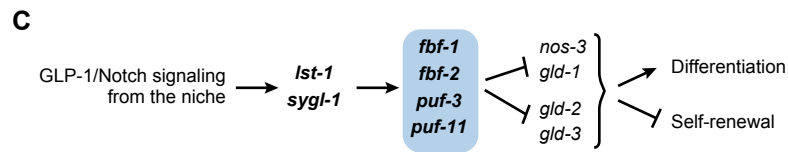

## Figure 7 Haupt et al

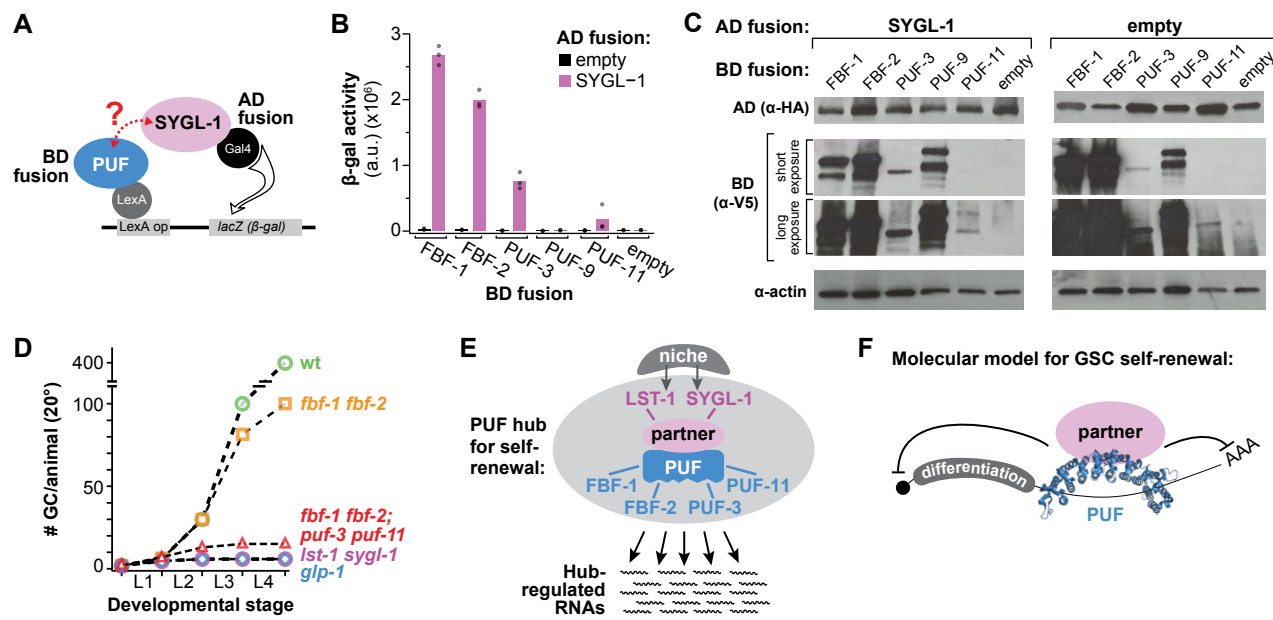

Source: https://www.biorxiv.org/content/10.1101/785923v1.full.pdf
